# Supplementary material for: Role of ADAM17 in the non-cell autonomous effects of oncogene-induced senescence
Source: PubMed Central journal article supplement (PMC4532141; doi:10.1186/s13058-015-0619-7), 2015-08-12
Supplement: 13058_2015_619_MOESM7_ESM.pdf [file 13058_2015_619_MOESM7_ESM.pdf]

Supplementary Table SV. Proteins identified by label-free quantitative proteomics in MCF7 Tet-Off p95HER2 shNT and shADAM17

| Gene Name | Proteins with transmembrane or GPI domains (Spectral Counts) |    |    |                               |    |    |                          |    |    |
|-----------|--------------------------------------------------------------|----|----|-------------------------------|----|----|--------------------------|----|----|
|           | -Doxy.                                                       |    |    |                               |    |    |                          |    |    |
|           | MCF7 Tet-Off p95HE2R shA17 #1                                |    |    | MCF7 Tet-Off p95HER2 shA17 #2 |    |    | MCF7 Tet-Off p95HER2shNT |    |    |
|           | A                                                            | B  | C  | A                             | B  | C  | A                        | B  | C  |
| ADAM9     | 10                                                           | 10 | 9  | 12                            | 17 | 19 | 10                       | 10 | 13 |
| ALCAM     | 5                                                            | 6  | 6  | 5                             | 3  | 4  | 9                        | 12 | 9  |
| APLP2     | 13                                                           | 8  | 11 | 2                             | 5  | 8  | 16                       | 8  | 10 |
| APP       | 8                                                            | 13 | 14 | 10                            | 9  | 12 | 16                       | 18 | 17 |
| AREG      | 6                                                            | 5  | 5  | 11                            | 7  | 9  | 11                       | 15 | 10 |
| ATP6AP1   | 15                                                           | 13 | 17 | 25                            | 21 | 19 | 16                       | 17 | 17 |
| ATP6AP2   | 8                                                            | 6  | 7  | 11                            | 9  | 5  | 7                        | 7  | 6  |
| B4GALT1   | 10                                                           | 8  | 8  | 3                             | 5  | 4  | 8                        | 8  | 6  |
| BCAM      |                                                              |    |    |                               |    |    |                          |    |    |
| CADM1     |                                                              |    |    |                               |    |    |                          |    |    |
| CD59      | 4                                                            | 5  | 7  | 10                            | 13 | 15 | 6                        | 8  | 9  |
| CD9       | 3                                                            | 4  | 5  | 1                             | 3  | 1  | 3                        | 4  | 4  |
| CDH1      | 11                                                           | 8  | 8  | 19                            | 17 | 17 | 16                       | 13 | 12 |
| CELSR2    |                                                              |    |    |                               |    |    |                          |    |    |
| CLIC1     | 25                                                           | 23 | 24 | 34                            | 35 | 36 | 21                       | 24 | 24 |
| CLIC3     | 8                                                            | 6  | 7  | 10                            | 9  | 4  | 4                        | 6  | 6  |
| CLSTN1    | 24                                                           | 23 | 25 | 27                            | 14 | 20 | 24                       | 27 | 23 |
| CRIM1     |                                                              |    |    |                               |    |    |                          |    |    |
| DAG1      | 8                                                            | 9  | 6  | 15                            | 16 | 15 | 11                       | 10 | 13 |
| DDR1      |                                                              |    |    |                               |    |    |                          |    |    |
| EPCAM     | 2                                                            | 2  | 3  | 1                             | 4  | 1  | 5                        | 2  | 4  |
| EPHA2     | 1                                                            | 3  | 1  | 0                             | 0  | 0  | 3                        | 5  | 2  |



|                          |     |     |     |     |     |     |     |     |     |
|--------------------------|-----|-----|-----|-----|-----|-----|-----|-----|-----|
| PTPRJ                    | 1   | 1   | 1   | 5   | 5   | 5   | 3   | 3   | 2   |
| PTPRK                    | 3   | 1   | 0   | 2   | 4   | 3   | 3   | 1   | 2   |
| PVR                      | 10  | 10  | 9   | 15  | 21  | 20  | 12  | 11  | 15  |
| PVRL2                    |     |     |     |     |     |     |     |     |     |
| PVRL4                    |     |     |     |     |     |     |     |     |     |
| QSOX1                    | 89  | 98  | 99  | 130 | 132 | 98  | 94  | 100 | 97  |
| RRBP1                    | 21  | 21  | 17  | 28  | 30  | 35  | 29  | 28  | 35  |
| RTN4                     | 8   | 8   | 8   | 18  | 10  | 9   | 9   | 11  | 10  |
| SDC4                     | 9   | 9   | 9   | 18  | 20  | 20  | 19  | 19  | 18  |
| SEC22B                   | 3   | 3   | 3   | 2   | 3   | 4   | 2   | 4   | 3   |
| SLC12A2                  |     |     |     |     |     |     |     |     |     |
| SLC3A2                   | 13  | 13  | 12  | 11  | 13  | 8   | 11  | 16  | 11  |
| ST14                     | 8   | 8   | 7   | 3   | 4   | 3   | 10  | 12  | 11  |
| TGOLN2                   | 3   | 6   | 3   | 7   | 8   | 8   | 5   | 6   | 5   |
| TMPO                     | 10  | 9   | 12  | 10  | 12  | 11  | 9   | 8   | 10  |
| ULBP2                    |     |     |     |     |     |     |     |     |     |
| VAPB                     | 6   | 6   | 5   | 6   | 8   | 7   | 5   | 3   | 1   |
| VASN                     | 10  | 11  | 12  | 20  | 18  | 20  | 20  | 24  | 21  |
| Total Spectral<br>counts | 479 | 457 | 453 | 584 | 596 | 564 | 528 | 543 | 535 |
