# Supplementary material for: Role of ADAM17 in the non-cell autonomous effects of oncogene-induced senescence
Source: Springer Nature journal article supplement (doi:10.1186/s13058-015-0619-7), 2015-08-10
Supplement: MOESM2 [file 9781530]

Supplementary Table SI. Proteins identified by label-free quantitative proteomics

| Gene Name | Proteins identified in the extracellular media (Spectral Counts) |        |        |                         |        |        |                         |        |        |
|-----------|------------------------------------------------------------------|--------|--------|-------------------------|--------|--------|-------------------------|--------|--------|
|           | +Doxy.                                                           |        |        | -Doxy.                  |        |        |                         |        |        |
|           | MCF7 Tet-Off p95HER2 #1                                          |        |        | MCF7 Tet-Off p95HER2 #1 |        |        | MCF7 Tet-Off p95HER2 #2 |        |        |
|           | A                                                                | B      | C      | A                       | B      | C      | A                       | B      | C      |
| FLNA      | 261,53                                                           | 256,69 | 250,13 | 259,58                  | 268,58 | 275,56 | 245,17                  | 247,51 | 261,77 |
| AGRN      | 157,12                                                           | 171,83 | 169,80 | 22,22                   | 28,67  | 27,17  | 26,27                   | 26,78  | 29,42  |
| ACTN4     | 132,26                                                           | 135,77 | 137,26 | 127,12                  | 133,81 | 133,90 | 132,32                  | 134,84 | 136,97 |
| ACTG1     | 151,15                                                           | 144,26 | 147,43 | 199,13                  | 200,72 | 190,17 | 204,31                  | 190,25 | 162,34 |
| KRT8      | 107,40                                                           | 106,07 | 107,78 | 105,79                  | 112,79 | 114,49 | 107,99                  | 100,67 | 103,49 |
| FLNB      | 71,60                                                            | 72,13  | 77,28  | 75,56                   | 86,02  | 89,27  | 72,00                   | 82,20  | 81,17  |
| TUBB      | 91,49                                                            | 96,52  | 96,59  | 94,23                   | 98,45  | 99,94  | 86,59                   | 89,59  | 87,26  |
| TUBB4B    | 85,52                                                            | 90,16  | 90,49  | 90,68                   | 100,36 | 97,03  | 87,56                   | 91,43  | 90,30  |
| HSPA8     | 76,57                                                            | 79,55  | 84,39  | 81,79                   | 88,89  | 87,33  | 91,45                   | 91,43  | 88,27  |
| ACTN1     | 79,55                                                            | 81,67  | 79,31  | 123,57                  | 130,95 | 134,87 | 142,05                  | 139,46 | 134,94 |
| KRT19     | 68,62                                                            | 73,19  | 67,11  | 75,56                   | 65,00  | 64,04  | 60,32                   | 59,11  | 58,85  |
| THBS1     | 101,43                                                           | 98,65  | 87,44  | 33,78                   | 35,37  | 38,81  | 27,24                   | 34,17  | 33,48  |
| IGFBP5    | 49,72                                                            | 54,10  | 61,01  | 0,00                    | 0,00   | 0,00   | 0,00                    | 0,00   | 0,00   |
| FASN      | 69,61                                                            | 65,76  | 72,19  | 86,23                   | 86,98  | 82,47  | 68,10                   | 67,42  | 62,91  |
| ENO1      | 83,53                                                            | 84,86  | 79,31  | 72,01                   | 65,95  | 67,92  | 65,19                   | 67,42  | 70,01  |
| ALDOA     | 69,61                                                            | 56,22  | 62,02  | 81,79                   | 78,38  | 84,41  | 80,75                   | 87,74  | 89,29  |
| KRT18     | 60,66                                                            | 55,16  | 54,91  | 78,23                   | 70,73  | 72,77  | 55,46                   | 62,80  | 61,89  |
| CFL1      | 70,60                                                            | 83,80  | 79,31  | 40,00                   | 46,84  | 42,69  | 42,81                   | 47,10  | 38,56  |
| HSPB1     | 61,65                                                            | 58,34  | 63,04  | 49,78                   | 46,84  | 44,63  | 53,51                   | 48,95  | 49,72  |
| YWHAZ     | 64,64                                                            | 64,70  | 73,21  | 59,56                   | 60,22  | 71,80  | 63,24                   | 66,50  | 78,13  |
| PKM2      | 57,68                                                            | 56,22  | 55,92  | 66,67                   | 65,95  | 66,95  | 64,21                   | 64,65  | 64,94  |
| EEF2      | 65,63                                                            | 70,01  | 57,96  | 112,01                  | 112,79 | 111,58 | 92,43                   | 90,51  | 83,20  |

|           |       |       |       |       |       |       |       |       |       |
|-----------|-------|-------|-------|-------|-------|-------|-------|-------|-------|
| HSP90AA1  | 68,62 | 62,58 | 68,12 | 86,23 | 86,98 | 91,21 | 93,40 | 92,36 | 90,30 |
| IGFBP2    | 47,73 | 51,98 | 58,97 | 17,78 | 19,12 | 17,47 | 17,51 | 16,62 | 21,31 |
| HSP90AB1  | 60,66 | 66,82 | 65,07 | 71,12 | 77,42 | 77,62 | 76,86 | 78,50 | 76,10 |
| HSPA1A    | 53,70 | 48,79 | 51,86 | 46,23 | 46,84 | 45,60 | 51,56 | 45,25 | 44,64 |
| IQGAP1    | 39,78 | 36,06 | 38,64 | 27,56 | 27,72 | 27,17 | 28,22 | 24,94 | 27,40 |
| AHNAK     | 41,77 | 35,00 | 42,71 | 42,67 | 36,32 | 38,81 | 39,89 | 35,10 | 39,57 |
| QSOX1     | 33,81 | 32,88 | 29,49 | 60,45 | 57,35 | 57,25 | 54,48 | 54,49 | 55,80 |
| BASP1     | 44,75 | 48,79 | 40,67 | 40,00 | 43,01 | 41,72 | 41,84 | 36,02 | 41,60 |
| PTPRF     | 42,76 | 56,22 | 49,82 | 0,00  | 0,00  | 0,00  | 0,00  | 0,00  | 0,00  |
| CLSTN1    | 43,75 | 39,25 | 37,62 | 14,22 | 14,34 | 16,50 | 14,59 | 16,62 | 16,23 |
| STC2      | 39,78 | 42,43 | 44,74 | 8,00  | 7,65  | 4,85  | 6,81  | 6,46  | 5,07  |
| PXDN      | 27,84 | 31,82 | 27,45 | 4,44  | 2,87  | 1,94  | 5,84  | 3,69  | 3,04  |
| CLU       | 29,83 | 30,76 | 26,44 | 7,11  | 10,51 | 7,76  | 6,81  | 6,46  | 5,07  |
| TUBB3     | 42,76 | 45,61 | 45,76 | 54,23 | 62,13 | 60,16 | 59,35 | 56,34 | 53,78 |
| TUBA1B    | 46,74 | 41,37 | 43,72 | 54,23 | 53,53 | 54,34 | 48,65 | 48,95 | 45,66 |
| PLEC      | 20,88 | 16,97 | 25,42 | 44,45 | 46,84 | 50,45 | 37,94 | 34,17 | 34,50 |
| VCP       | 45,74 | 45,61 | 45,76 | 55,12 | 51,61 | 56,28 | 49,62 | 61,88 | 54,79 |
| TRIM28    | 38,78 | 46,67 | 46,77 | 27,56 | 33,45 | 38,81 | 29,19 | 40,64 | 34,50 |
| TUBA1C    | 42,76 | 41,37 | 42,71 | 52,45 | 50,66 | 53,37 | 47,67 | 48,03 | 44,64 |
| HNRNPA2B1 | 35,80 | 38,19 | 34,57 | 28,45 | 28,67 | 26,20 | 32,11 | 26,78 | 28,41 |
| PPIA      | 50,72 | 45,61 | 44,74 | 32,89 | 34,41 | 37,84 | 37,94 | 41,56 | 38,56 |
| GPI       | 50,72 | 40,31 | 43,72 | 33,78 | 25,81 | 23,29 | 29,19 | 27,71 | 26,38 |
| RDX       | 22,87 | 26,52 | 32,54 | 20,45 | 16,25 | 15,52 | 20,43 | 20,32 | 16,23 |
| GDI2      | 42,76 | 39,25 | 35,59 | 35,56 | 29,63 | 34,93 | 38,92 | 31,40 | 39,57 |
| UGDH      | 49,72 | 48,79 | 42,71 | 28,45 | 26,76 | 27,17 | 18,49 | 23,09 | 23,34 |
| TPI1      | 37,79 | 41,37 | 43,72 | 37,34 | 36,32 | 35,90 | 35,03 | 37,87 | 43,63 |
| TFF1      | 31,82 | 37,13 | 37,62 | 10,67 | 11,47 | 12,61 | 9,73  | 12,01 | 13,19 |
| LMNA      | 30,83 | 32,88 | 29,49 | 43,56 | 47,79 | 43,66 | 39,89 | 38,79 | 36,53 |

|        |       |       |       |       |       |       |       |       |       |
|--------|-------|-------|-------|-------|-------|-------|-------|-------|-------|
| TPM4   | 35,80 | 37,13 | 37,62 | 40,89 | 43,01 | 41,72 | 38,92 | 42,48 | 39,57 |
| SEMA3C | 25,86 | 22,28 | 23,39 | 0,89  | 0,96  | 0,00  | 0,97  | 0,00  | 0,00  |
| LTBP1  | 11,93 | 12,73 | 14,24 | 0,00  | 0,00  | 0,00  | 0,00  | 0,00  | 0,00  |
| UBA1   | 41,77 | 41,37 | 45,76 | 31,11 | 34,41 | 33,96 | 34,05 | 35,10 | 35,51 |
| G6PD   | 38,78 | 38,19 | 34,57 | 32,89 | 37,28 | 38,81 | 36,00 | 30,48 | 33,48 |
| SPTAN1 | 16,91 | 14,85 | 17,29 | 42,67 | 38,23 | 28,14 | 33,08 | 31,40 | 28,41 |
| EEF1A1 | 33,81 | 29,70 | 38,64 | 40,89 | 38,23 | 42,69 | 36,97 | 41,56 | 38,56 |
| YWHAE  | 32,82 | 30,76 | 32,54 | 22,22 | 27,72 | 27,17 | 28,22 | 30,48 | 32,47 |
| ATIC   | 29,83 | 30,76 | 23,39 | 23,11 | 19,12 | 21,35 | 23,35 | 19,40 | 23,34 |
| ALCAM  | 26,85 | 27,58 | 23,39 | 6,22  | 7,65  | 9,70  | 3,89  | 6,46  | 7,10  |
| CST3   | 24,86 | 21,21 | 20,34 | 3,56  | 5,73  | 3,88  | 4,86  | 4,62  | 5,07  |
| YWHAB  | 30,83 | 32,88 | 35,59 | 28,45 | 31,54 | 33,96 | 31,13 | 36,02 | 35,51 |
| NRCAM  | 18,89 | 16,97 | 14,24 | 0,00  | 0,00  | 0,00  | 0,00  | 0,00  | 0,00  |
| DPP3   | 31,82 | 28,64 | 32,54 | 16,00 | 14,34 | 12,61 | 13,62 | 15,70 | 11,16 |
| PRDX1  | 29,83 | 31,82 | 27,45 | 23,11 | 24,85 | 22,32 | 23,35 | 25,86 | 28,41 |
| NME2   | 30,83 | 25,46 | 26,44 | 25,78 | 28,67 | 28,14 | 28,22 | 27,71 | 23,34 |
| STIP1  | 28,84 | 22,28 | 25,42 | 26,67 | 30,59 | 32,02 | 34,05 | 32,33 | 32,47 |
| CPE    | 27,84 | 28,64 | 24,40 | 11,56 | 12,43 | 7,76  | 9,73  | 11,08 | 9,13  |
| PEBP1  | 25,86 | 20,15 | 27,45 | 16,00 | 16,25 | 19,41 | 16,54 | 19,40 | 15,22 |
| CELSR2 | 22,87 | 25,46 | 23,39 | 0,00  | 0,00  | 0,00  | 0,00  | 0,00  | 0,00  |
| APP    | 26,85 | 26,52 | 31,52 | 14,22 | 11,47 | 11,64 | 13,62 | 12,01 | 12,18 |
| MARCKS | 30,83 | 31,82 | 32,54 | 14,22 | 13,38 | 14,55 | 15,57 | 14,78 | 17,25 |
| HNRNPK | 26,85 | 27,58 | 25,42 | 21,34 | 19,12 | 19,41 | 21,40 | 18,47 | 18,26 |
| IGFBP4 | 23,87 | 24,40 | 19,32 | 7,11  | 5,73  | 6,79  | 5,84  | 5,54  | 4,06  |
| NME1   | 22,87 | 21,21 | 21,35 | 22,22 | 20,07 | 22,32 | 22,38 | 24,01 | 24,35 |
| TKT    | 24,86 | 26,52 | 26,44 | 24,89 | 21,03 | 20,38 | 17,51 | 21,24 | 19,28 |
| PFN1   | 24,86 | 32,88 | 29,49 | 26,67 | 31,54 | 29,11 | 28,22 | 29,55 | 31,45 |
| ACTR3  | 28,84 | 25,46 | 26,44 | 27,56 | 28,67 | 31,05 | 32,11 | 28,63 | 31,45 |

|          |       |       |       |       |       |       |       |       |       |
|----------|-------|-------|-------|-------|-------|-------|-------|-------|-------|
| P4HB     | 20,88 | 15,91 | 18,30 | 63,12 | 64,04 | 64,04 | 62,27 | 54,49 | 53,78 |
| UBA52    | 25,86 | 30,76 | 29,49 | 24,00 | 24,85 | 24,26 | 28,22 | 31,40 | 26,38 |
| EEF1A2   | 24,86 | 24,40 | 25,42 | 35,56 | 30,59 | 35,90 | 28,22 | 30,48 | 30,44 |
| CALR     | 19,89 | 18,03 | 12,20 | 46,23 | 49,70 | 46,57 | 38,92 | 43,41 | 43,63 |
| YWHAQ    | 26,85 | 26,52 | 27,45 | 24,00 | 26,76 | 26,20 | 24,32 | 31,40 | 26,38 |
| HMGB1    | 31,82 | 36,06 | 28,47 | 24,89 | 24,85 | 21,35 | 20,43 | 28,63 | 19,28 |
| PRDX6    | 27,84 | 22,28 | 20,34 | 22,22 | 20,07 | 22,32 | 25,30 | 25,86 | 25,37 |
| SFN      | 20,88 | 22,28 | 27,45 | 24,89 | 30,59 | 32,99 | 31,13 | 32,33 | 34,50 |
| FBP1     | 15,91 | 16,97 | 20,34 | 1,78  | 0,00  | 1,94  | 0,97  | 2,77  | 1,01  |
| CTTN     | 18,89 | 20,15 | 20,34 | 14,22 | 13,38 | 17,47 | 18,49 | 16,62 | 18,26 |
| YBX1     | 22,87 | 23,34 | 22,37 | 27,56 | 25,81 | 28,14 | 23,35 | 28,63 | 30,44 |
| CLTC     | 20,88 | 16,97 | 20,34 | 81,79 | 72,64 | 69,86 | 62,27 | 66,50 | 63,92 |
| LDHA     | 22,87 | 22,28 | 16,27 | 31,11 | 24,85 | 25,23 | 25,30 | 25,86 | 22,32 |
| HSPA5    | 19,89 | 20,15 | 22,37 | 62,23 | 63,08 | 56,28 | 64,21 | 61,88 | 58,85 |
| COL12A1  | 15,91 | 19,09 | 21,35 | 0,00  | 0,00  | 0,00  | 0,00  | 0,00  | 0,00  |
| CORO1B   | 19,89 | 20,15 | 23,39 | 6,22  | 6,69  | 8,73  | 11,68 | 7,39  | 7,10  |
| SLC9A3R1 | 22,87 | 24,40 | 21,35 | 12,45 | 11,47 | 13,58 | 12,65 | 15,70 | 14,21 |
| PGK1     | 23,87 | 23,34 | 21,35 | 28,45 | 30,59 | 30,08 | 34,05 | 32,33 | 38,56 |
| LSR      | 15,91 | 16,97 | 17,29 | 11,56 | 13,38 | 12,61 | 14,59 | 12,01 | 14,21 |
| CDH1     | 20,88 | 20,15 | 21,35 | 8,89  | 10,51 | 11,64 | 8,76  | 10,16 | 9,13  |
| TAGLN2   | 28,84 | 26,52 | 32,54 | 37,34 | 34,41 | 35,90 | 37,94 | 36,94 | 36,53 |
| EFEMP1   | 17,90 | 16,97 | 17,29 | 0,00  | 0,00  | 0,00  | 0,00  | 0,00  | 0,00  |
| NPEPPS   | 14,92 | 14,85 | 14,24 | 18,67 | 15,29 | 17,47 | 17,51 | 20,32 | 19,28 |
| HDGF     | 19,89 | 21,21 | 19,32 | 16,89 | 14,34 | 17,47 | 20,43 | 18,47 | 15,22 |
| ST14     | 9,94  | 8,49  | 13,22 | 4,44  | 3,82  | 6,79  | 3,89  | 4,62  | 4,06  |
| HSPA4    | 25,86 | 27,58 | 28,47 | 29,34 | 35,37 | 35,90 | 36,00 | 34,17 | 36,53 |
| GDI1     | 23,87 | 24,40 | 22,37 | 24,89 | 23,90 | 27,17 | 24,32 | 24,01 | 32,47 |
| PTPRK    | 15,91 | 15,91 | 18,30 | 1,78  | 0,96  | 0,97  | 0,97  | 1,85  | 1,01  |

|         |       |       |       |       |       |       |       |       |       |
|---------|-------|-------|-------|-------|-------|-------|-------|-------|-------|
| S100A11 | 31,82 | 32,88 | 29,49 | 54,23 | 56,39 | 49,48 | 39,89 | 42,48 | 33,48 |
| SH3BGRL | 23,87 | 23,34 | 27,45 | 6,22  | 8,60  | 4,85  | 6,81  | 4,62  | 6,09  |
| GSN     | 21,88 | 24,40 | 28,47 | 16,89 | 18,16 | 20,38 | 19,46 | 19,40 | 22,32 |
| PRDX2   | 16,91 | 20,15 | 16,27 | 14,22 | 13,38 | 11,64 | 17,51 | 12,93 | 13,19 |
| TIMP1   | 16,91 | 14,85 | 18,30 | 15,11 | 16,25 | 14,55 | 13,62 | 14,78 | 13,19 |
| YWHAG   | 20,88 | 21,21 | 25,42 | 20,45 | 25,81 | 25,23 | 24,32 | 24,01 | 28,41 |
| CTSD    | 23,87 | 21,21 | 21,35 | 12,45 | 13,38 | 13,58 | 18,49 | 15,70 | 18,26 |
| EZR     | 24,86 | 18,03 | 22,37 | 24,89 | 25,81 | 23,29 | 19,46 | 24,01 | 21,31 |
| PPA1    | 15,91 | 18,03 | 14,24 | 21,34 | 21,03 | 19,41 | 23,35 | 22,17 | 22,32 |
| SULF2   | 19,89 | 20,15 | 18,30 | 0,00  | 0,00  | 0,00  | 0,00  | 0,00  | 0,00  |
| NRP1    | 8,95  | 7,42  | 9,15  | 3,56  | 0,96  | 2,91  | 0,97  | 1,85  | 2,03  |
| GSTM3   | 14,92 | 14,85 | 15,25 | 8,00  | 8,60  | 8,73  | 9,73  | 8,31  | 5,07  |
| EEF1G   | 20,88 | 21,21 | 19,32 | 37,34 | 34,41 | 29,11 | 30,16 | 31,40 | 32,47 |
| DKK1    | 16,91 | 18,03 | 13,22 | 1,78  | 0,96  | 0,97  | 0,97  | 0,92  | 1,01  |
| FREM2   | 0,99  | 4,24  | 3,05  | 0,00  | 0,00  | 0,00  | 0,00  | 0,00  | 0,00  |
| TPT1    | 18,89 | 19,09 | 19,32 | 33,78 | 46,84 | 41,72 | 38,92 | 53,57 | 32,47 |
| CTNNA1  | 14,92 | 15,91 | 15,25 | 2,67  | 4,78  | 1,94  | 1,95  | 2,77  | 3,04  |
| BCAM    | 14,92 | 15,91 | 14,24 | 0,00  | 0,00  | 0,00  | 0,00  | 0,00  | 0,00  |
| SPINT1  | 15,91 | 14,85 | 12,20 | 10,67 | 13,38 | 8,73  | 11,68 | 14,78 | 12,18 |
| NPM1    | 33,81 | 36,06 | 32,54 | 38,23 | 43,01 | 42,69 | 39,89 | 41,56 | 42,61 |
| ACLY    | 14,92 | 15,91 | 12,20 | 19,56 | 25,81 | 25,23 | 25,30 | 19,40 | 21,31 |
| PRKCSH  | 12,93 | 10,61 | 12,20 | 24,89 | 23,90 | 23,29 | 27,24 | 24,94 | 28,41 |
| NUCB1   | 8,95  | 8,49  | 9,15  | 1,78  | 1,91  | 0,97  | 1,95  | 1,85  | 2,03  |
| APLP2   | 10,94 | 7,42  | 7,12  | 6,22  | 6,69  | 4,85  | 5,84  | 2,77  | 6,09  |
| GLG1    | 5,97  | 7,42  | 7,12  | 1,78  | 1,91  | 0,97  | 1,95  | 2,77  | 2,03  |
| SYNCRIP | 15,91 | 15,91 | 16,27 | 13,34 | 17,21 | 18,44 | 17,51 | 16,62 | 19,28 |
| PSME1   | 19,89 | 22,28 | 23,39 | 12,45 | 12,43 | 10,67 | 13,62 | 13,85 | 10,15 |
| ALB     | 11,93 | 13,79 | 14,24 | 8,00  | 13,38 | 7,76  | 10,70 | 10,16 | 9,13  |

|         |       |       |       |       |       |       |       |       |       |
|---------|-------|-------|-------|-------|-------|-------|-------|-------|-------|
| LYPD3   | 14,92 | 14,85 | 15,25 | 6,22  | 6,69  | 5,82  | 5,84  | 5,54  | 7,10  |
| AMOTL1  | 1,99  | 2,12  | 2,03  | 0,00  | 0,00  | 0,00  | 0,00  | 0,00  | 0,00  |
| PGD     | 17,90 | 20,15 | 20,34 | 13,34 | 15,29 | 13,58 | 19,46 | 17,55 | 17,25 |
| NEO1    | 10,94 | 15,91 | 12,20 | 0,00  | 0,00  | 0,00  | 0,00  | 0,00  | 0,00  |
| TPM3    | 16,91 | 16,97 | 17,29 | 16,89 | 14,34 | 15,52 | 16,54 | 15,70 | 14,21 |
| LXN     | 12,93 | 14,85 | 16,27 | 7,11  | 6,69  | 6,79  | 7,78  | 7,39  | 7,10  |
| CALM1   | 15,91 | 14,85 | 17,29 | 9,78  | 9,56  | 7,76  | 6,81  | 7,39  | 11,16 |
| CLIC1   | 13,92 | 14,85 | 17,29 | 19,56 | 21,03 | 21,35 | 25,30 | 22,17 | 22,32 |
| AARS    | 16,91 | 15,91 | 12,20 | 7,11  | 6,69  | 8,73  | 7,78  | 7,39  | 8,12  |
| GFRA1   | 5,97  | 5,30  | 6,10  | 0,00  | 0,00  | 0,00  | 0,00  | 0,00  | 0,00  |
| TFF3    | 16,91 | 15,91 | 17,29 | 0,00  | 0,00  | 0,00  | 0,00  | 0,00  | 0,00  |
| TPM1    | 15,91 | 16,97 | 18,30 | 16,89 | 18,16 | 17,47 | 18,49 | 19,40 | 16,23 |
| PARK7   | 20,88 | 16,97 | 18,30 | 12,45 | 16,25 | 13,58 | 15,57 | 14,78 | 13,19 |
| ALDOC   | 13,92 | 11,67 | 13,22 | 15,11 | 14,34 | 14,55 | 16,54 | 16,62 | 19,28 |
| HNRNPA1 | 14,92 | 10,61 | 11,19 | 7,11  | 7,65  | 2,91  | 7,78  | 5,54  | 6,09  |
| SFPQ    | 7,96  | 12,73 | 7,12  | 5,33  | 3,82  | 5,82  | 3,89  | 4,62  | 4,06  |
| TUBB6   | 21,88 | 24,40 | 23,39 | 24,00 | 29,63 | 25,23 | 26,27 | 26,78 | 24,35 |
| CA2     | 21,88 | 21,21 | 17,29 | 1,78  | 1,91  | 0,97  | 5,84  | 1,85  | 4,06  |
| LMNB1   | 15,91 | 16,97 | 12,20 | 3,56  | 1,91  | 0,00  | 0,00  | 0,92  | 0,00  |
| EPS15L1 | 9,94  | 7,42  | 12,20 | 0,00  | 0,00  | 0,00  | 0,00  | 0,00  | 0,00  |
| B2M     | 13,92 | 10,61 | 13,22 | 12,45 | 12,43 | 10,67 | 11,68 | 8,31  | 11,16 |
| VCL     | 11,93 | 13,79 | 17,29 | 28,45 | 32,50 | 32,99 | 40,86 | 37,87 | 40,59 |
| KRT1    | 14,92 | 16,97 | 13,22 | 16,89 | 12,43 | 17,47 | 27,24 | 24,94 | 21,31 |
| CAP1    | 14,92 | 13,79 | 16,27 | 21,34 | 21,98 | 23,29 | 21,40 | 20,32 | 20,29 |
| XRCC5   | 10,94 | 7,42  | 11,19 | 6,22  | 8,60  | 10,67 | 6,81  | 10,16 | 6,09  |
| BLVRB   | 12,93 | 14,85 | 15,25 | 21,34 | 23,90 | 18,44 | 22,38 | 22,17 | 23,34 |
| CBX3    | 12,93 | 16,97 | 15,25 | 13,34 | 13,38 | 12,61 | 13,62 | 12,93 | 14,21 |
| PGAM1   | 12,93 | 13,79 | 13,22 | 17,78 | 19,12 | 18,44 | 20,43 | 23,09 | 23,34 |

|          |       |       |       |       |       |       |       |       |       |
|----------|-------|-------|-------|-------|-------|-------|-------|-------|-------|
| PABPC1   | 10,94 | 9,55  | 13,22 | 14,22 | 17,21 | 14,55 | 13,62 | 13,85 | 16,23 |
| SDF4     | 11,93 | 11,67 | 13,22 | 7,11  | 8,60  | 6,79  | 4,86  | 7,39  | 6,09  |
| GGH      | 13,92 | 11,67 | 11,19 | 0,00  | 0,00  | 0,00  | 0,97  | 0,00  | 1,01  |
| HSPH1    | 13,92 | 14,85 | 13,22 | 32,00 | 32,50 | 30,08 | 37,94 | 37,87 | 33,48 |
| SOD1     | 13,92 | 12,73 | 14,24 | 9,78  | 12,43 | 7,76  | 8,76  | 8,31  | 5,07  |
| FUBP1    | 13,92 | 9,55  | 10,17 | 13,34 | 8,60  | 9,70  | 10,70 | 12,01 | 12,18 |
| PTBP1    | 12,93 | 13,79 | 17,29 | 12,45 | 9,56  | 14,55 | 14,59 | 11,08 | 10,15 |
| PSAP     | 11,93 | 11,67 | 14,24 | 40,00 | 39,19 | 40,75 | 44,75 | 39,71 | 41,60 |
| PSMA5    | 8,95  | 9,55  | 11,19 | 11,56 | 11,47 | 9,70  | 11,68 | 11,08 | 15,22 |
| MYL6     | 9,94  | 10,61 | 13,22 | 10,67 | 8,60  | 10,67 | 6,81  | 7,39  | 9,13  |
| EEF1B2   | 12,93 | 13,79 | 14,24 | 18,67 | 25,81 | 20,38 | 21,40 | 23,09 | 20,29 |
| TPD52L2  | 9,94  | 10,61 | 10,17 | 15,11 | 18,16 | 19,41 | 14,59 | 18,47 | 20,29 |
| PCBP1    | 9,94  | 7,42  | 10,17 | 8,89  | 9,56  | 5,82  | 9,73  | 10,16 | 10,15 |
| HNRNPD   | 9,94  | 11,67 | 11,19 | 10,67 | 9,56  | 7,76  | 9,73  | 9,24  | 8,12  |
| GPC1     | 5,97  | 9,55  | 8,13  | 0,00  | 0,00  | 0,00  | 0,00  | 0,00  | 0,00  |
| DAG1     | 9,94  | 11,67 | 11,19 | 2,67  | 1,91  | 2,91  | 1,95  | 1,85  | 3,04  |
| YWHAH    | 10,94 | 13,79 | 14,24 | 8,00  | 12,43 | 12,61 | 11,68 | 12,93 | 12,18 |
| LASP1    | 13,92 | 14,85 | 11,19 | 16,00 | 15,29 | 16,50 | 13,62 | 17,55 | 16,23 |
| HNRNPL   | 10,94 | 12,73 | 14,24 | 8,00  | 8,60  | 7,76  | 6,81  | 6,46  | 9,13  |
| RAD23B   | 17,90 | 11,67 | 11,19 | 13,34 | 13,38 | 13,58 | 11,68 | 13,85 | 9,13  |
| BAG3     | 6,96  | 5,30  | 5,08  | 16,89 | 12,43 | 14,55 | 11,68 | 16,62 | 13,19 |
| VASP     | 13,92 | 14,85 | 8,13  | 12,45 | 11,47 | 8,73  | 12,65 | 8,31  | 12,18 |
| MDH1     | 16,91 | 12,73 | 14,24 | 8,00  | 11,47 | 6,79  | 9,73  | 11,08 | 9,13  |
| RPLP2    | 12,93 | 12,73 | 13,22 | 16,00 | 15,29 | 18,44 | 15,57 | 13,85 | 17,25 |
| KPNB1    | 17,90 | 18,03 | 19,32 | 21,34 | 20,07 | 21,35 | 20,43 | 24,01 | 25,37 |
| SDC4     | 11,93 | 13,79 | 13,22 | 8,89  | 10,51 | 9,70  | 11,68 | 10,16 | 11,16 |
| MARCKSL1 | 12,93 | 14,85 | 17,29 | 5,33  | 4,78  | 4,85  | 5,84  | 5,54  | 7,10  |
| LAP3     | 10,94 | 11,67 | 9,15  | 8,00  | 6,69  | 8,73  | 9,73  | 6,46  | 9,13  |

|         |       |       |       |       |       |       |       |       |       |
|---------|-------|-------|-------|-------|-------|-------|-------|-------|-------|
| GDF15   | 14,92 | 15,91 | 18,30 | 15,11 | 16,25 | 15,52 | 16,54 | 16,62 | 17,25 |
| MDK     | 12,93 | 12,73 | 12,20 | 4,44  | 5,73  | 4,85  | 3,89  | 5,54  | 2,03  |
| KRT10   | 9,94  | 7,42  | 7,12  | 8,89  | 6,69  | 9,70  | 14,59 | 13,85 | 13,19 |
| GLO1    | 8,95  | 8,49  | 11,19 | 9,78  | 7,65  | 6,79  | 7,78  | 8,31  | 8,12  |
| HMGB2   | 13,92 | 14,85 | 13,22 | 2,67  | 0,96  | 0,97  | 1,95  | 2,77  | 0,00  |
| EEF1D   | 9,94  | 12,73 | 13,22 | 16,89 | 18,16 | 18,44 | 19,46 | 19,40 | 19,28 |
| PSMA4   | 11,93 | 10,61 | 12,20 | 8,00  | 7,65  | 7,76  | 10,70 | 12,01 | 12,18 |
| RNH1    | 10,94 | 11,67 | 12,20 | 13,34 | 13,38 | 12,61 | 11,68 | 13,85 | 9,13  |
| TARS    | 9,94  | 9,55  | 10,17 | 13,34 | 13,38 | 11,64 | 13,62 | 12,93 | 15,22 |
| ENO2    | 13,92 | 15,91 | 13,22 | 0,00  | 7,65  | 10,67 | 11,68 | 12,93 | 12,18 |
| GAA     | 8,95  | 7,42  | 11,19 | 1,78  | 0,96  | 0,97  | 1,95  | 1,85  | 1,01  |
| DDR1    | 5,97  | 5,30  | 5,08  | 0,00  | 0,00  | 0,00  | 0,00  | 0,92  | 0,00  |
| HNRNP1  | 6,96  | 10,61 | 9,15  | 7,11  | 9,56  | 6,79  | 7,78  | 7,39  | 5,07  |
| HNRNPAB | 9,94  | 11,67 | 11,19 | 8,89  | 6,69  | 7,76  | 9,73  | 10,16 | 10,15 |
| CAPZB   | 13,92 | 12,73 | 13,22 | 9,78  | 9,56  | 6,79  | 10,70 | 11,08 | 11,16 |
| SPTBN1  | 5,97  | 3,18  | 3,05  | 24,89 | 25,81 | 22,32 | 25,30 | 22,17 | 25,37 |
| LAMA5   | 19,89 | 27,58 | 22,37 | 3,56  | 0,00  | 4,85  | 0,00  | 0,92  | 1,01  |
| RBMX    | 9,94  | 8,49  | 10,17 | 7,11  | 5,73  | 5,82  | 5,84  | 6,46  | 6,09  |
| SET     | 14,92 | 15,91 | 15,25 | 16,89 | 16,25 | 21,35 | 17,51 | 15,70 | 14,21 |
| DBNL    | 7,96  | 9,55  | 12,20 | 4,44  | 3,82  | 3,88  | 3,89  | 5,54  | 7,10  |
| PSMA1   | 13,92 | 13,79 | 9,15  | 10,67 | 12,43 | 9,70  | 9,73  | 11,08 | 14,21 |
| FUS     | 10,94 | 8,49  | 10,17 | 10,67 | 6,69  | 9,70  | 5,84  | 7,39  | 7,10  |
| PA2G4   | 8,95  | 9,55  | 13,22 | 9,78  | 11,47 | 13,58 | 10,70 | 13,85 | 15,22 |
| CDC37   | 8,95  | 9,55  | 10,17 | 15,11 | 20,07 | 16,50 | 18,49 | 18,47 | 18,26 |
| NUCB2   | 6,96  | 6,36  | 4,07  | 4,44  | 4,78  | 3,88  | 3,89  | 4,62  | 6,09  |
| SLC3A2  | 9,94  | 11,67 | 9,15  | 11,56 | 12,43 | 11,64 | 13,62 | 12,01 | 10,15 |
| CGREF1  | 5,97  | 5,30  | 6,10  | 0,00  | 0,00  | 0,00  | 0,00  | 0,00  | 0,00  |
| PLOD3   | 9,94  | 10,61 | 9,15  | 25,78 | 21,98 | 24,26 | 29,19 | 31,40 | 34,50 |

|        |       |       |       |       |       |       |       |       |       |
|--------|-------|-------|-------|-------|-------|-------|-------|-------|-------|
| CAPZA1 | 12,93 | 12,73 | 9,15  | 8,00  | 9,56  | 11,64 | 12,65 | 10,16 | 12,18 |
| GOT1   | 13,92 | 11,67 | 11,19 | 7,11  | 9,56  | 8,73  | 9,73  | 8,31  | 11,16 |
| OTUB1  | 8,95  | 8,49  | 7,12  | 6,22  | 7,65  | 6,79  | 6,81  | 8,31  | 7,10  |
| HNRNPF | 8,95  | 10,61 | 8,13  | 5,33  | 7,65  | 4,85  | 6,81  | 6,46  | 4,06  |
| KRT9   | 8,95  | 10,61 | 9,15  | 7,11  | 8,60  | 7,76  | 11,68 | 17,55 | 12,18 |
| PRDX5  | 8,95  | 9,55  | 13,22 | 14,22 | 12,43 | 13,58 | 16,54 | 13,85 | 15,22 |
| RNPEP  | 9,94  | 5,30  | 13,22 | 4,44  | 5,73  | 5,82  | 2,92  | 3,69  | 5,07  |
| TXN    | 11,93 | 13,79 | 12,20 | 9,78  | 12,43 | 9,70  | 8,76  | 11,08 | 11,16 |
| HSPG2  | 7,96  | 8,49  | 5,08  | 0,89  | 0,00  | 0,00  | 0,97  | 0,92  | 1,01  |
| GAPDH  | 8,95  | 12,73 | 13,22 | 16,00 | 14,34 | 13,58 | 13,62 | 15,70 | 19,28 |
| CSRP1  | 7,96  | 7,42  | 8,13  | 9,78  | 9,56  | 9,70  | 12,65 | 12,93 | 12,18 |
| EPHB4  | 8,95  | 11,67 | 8,13  | 0,00  | 0,00  | 0,00  | 0,00  | 0,00  | 0,00  |
| HMGB3  | 4,97  | 9,55  | 10,17 | 2,67  | 2,87  | 3,88  | 3,89  | 3,69  | 7,10  |
| LGALS3 | 9,94  | 12,73 | 15,25 | 5,33  | 5,73  | 3,88  | 4,86  | 3,69  | 5,07  |
| GRN    | 6,96  | 9,55  | 7,12  | 14,22 | 11,47 | 9,70  | 13,62 | 12,93 | 11,16 |
| FKBP4  | 11,93 | 12,73 | 12,20 | 11,56 | 9,56  | 11,64 | 12,65 | 11,08 | 15,22 |
| CSDA   | 7,96  | 8,49  | 9,15  | 9,78  | 9,56  | 6,79  | 8,76  | 10,16 | 9,13  |
| RPL5   | 9,94  | 12,73 | 10,17 | 7,11  | 8,60  | 8,73  | 11,68 | 13,85 | 10,15 |
| PDAP1  | 9,94  | 9,55  | 11,19 | 8,89  | 8,60  | 6,79  | 10,70 | 6,46  | 5,07  |
| TPD52  | 7,96  | 8,49  | 6,10  | 8,89  | 4,78  | 10,67 | 9,73  | 7,39  | 9,13  |
| CSE1L  | 13,92 | 11,67 | 10,17 | 6,22  | 4,78  | 7,76  | 5,84  | 9,24  | 9,13  |
| DNPEP  | 9,94  | 10,61 | 12,20 | 4,44  | 2,87  | 2,91  | 1,95  | 3,69  | 4,06  |
| PSMB1  | 11,93 | 10,61 | 11,19 | 10,67 | 8,60  | 6,79  | 7,78  | 5,54  | 5,07  |
| MIF    | 9,94  | 9,55  | 8,13  | 7,11  | 8,60  | 6,79  | 7,78  | 9,24  | 9,13  |
| SND1   | 6,96  | 4,24  | 9,15  | 13,34 | 12,43 | 11,64 | 9,73  | 11,08 | 10,15 |
| SERBP1 | 11,93 | 7,42  | 8,13  | 11,56 | 8,60  | 11,64 | 9,73  | 9,24  | 8,12  |
| FAM49B | 7,96  | 10,61 | 13,22 | 5,33  | 6,69  | 7,76  | 7,78  | 9,24  | 9,13  |
| EPPK1  | 2,98  | 3,18  | 6,10  | 24,89 | 24,85 | 26,20 | 21,40 | 24,01 | 23,34 |

|         |       |       |       |       |       |       |       |       |       |
|---------|-------|-------|-------|-------|-------|-------|-------|-------|-------|
| PNP     | 5,97  | 8,49  | 6,10  | 23,11 | 21,98 | 22,32 | 26,27 | 24,01 | 21,31 |
| HN1     | 7,96  | 8,49  | 5,08  | 8,89  | 10,51 | 8,73  | 7,78  | 8,31  | 8,12  |
| HNRPDL  | 8,95  | 7,42  | 8,13  | 0,00  | 0,00  | 5,82  | 0,00  | 0,00  | 7,10  |
| SF3B3   | 7,96  | 6,36  | 7,12  | 0,89  | 0,96  | 0,97  | 1,95  | 2,77  | 2,03  |
| KRT2    | 0,00  | 8,49  | 7,12  | 8,00  | 7,65  | 8,73  | 8,76  | 9,24  | 6,09  |
| UBE2L3  | 10,94 | 8,49  | 7,12  | 8,00  | 8,60  | 6,79  | 9,73  | 9,24  | 6,09  |
| PDIA3   | 5,97  | 8,49  | 3,05  | 24,00 | 26,76 | 25,23 | 20,43 | 24,94 | 24,35 |
| EIF5A   | 14,92 | 10,61 | 9,15  | 11,56 | 11,47 | 10,67 | 10,70 | 12,93 | 12,18 |
| CADM1   | 3,98  | 4,24  | 4,07  | 0,00  | 0,00  | 0,00  | 0,00  | 0,00  | 0,00  |
| HMGN1   | 8,95  | 11,67 | 7,12  | 4,44  | 2,87  | 3,88  | 3,89  | 3,69  | 5,07  |
| PCBP2   | 9,94  | 8,49  | 9,15  | 5,33  | 5,73  | 6,79  | 3,89  | 6,46  | 8,12  |
| CCT8    | 7,96  | 10,61 | 9,15  | 14,22 | 7,65  | 10,67 | 12,65 | 12,93 | 12,18 |
| MDH2    | 5,97  | 7,42  | 6,10  | 5,33  | 5,73  | 5,82  | 4,86  | 5,54  | 7,10  |
| MYL12A  | 6,96  | 7,42  | 7,12  | 8,00  | 9,56  | 8,73  | 10,70 | 7,39  | 9,13  |
| RPL12   | 6,96  | 8,49  | 8,13  | 8,89  | 9,56  | 8,73  | 9,73  | 9,24  | 11,16 |
| PPP2R1A | 10,94 | 13,79 | 13,22 | 16,00 | 15,29 | 13,58 | 18,49 | 22,17 | 16,23 |
| ARPC3   | 8,95  | 10,61 | 8,13  | 9,78  | 9,56  | 8,73  | 10,70 | 11,08 | 9,13  |
| PDIA6   | 2,98  | 1,06  | 3,05  | 19,56 | 21,98 | 27,17 | 19,46 | 21,24 | 20,29 |
| ILF3    | 8,95  | 10,61 | 6,10  | 4,44  | 4,78  | 4,85  | 3,89  | 6,46  | 5,07  |
| CUTA    | 6,96  | 9,55  | 7,12  | 4,44  | 3,82  | 2,91  | 1,95  | 2,77  | 2,03  |
| PPP1CA  | 5,97  | 8,49  | 5,08  | 4,44  | 4,78  | 5,82  | 7,78  | 5,54  | 4,06  |
| UBE2N   | 8,95  | 8,49  | 8,13  | 6,22  | 7,65  | 7,76  | 5,84  | 7,39  | 7,10  |
| PREX1   | 1,99  | 2,12  | 2,03  | 0,00  | 0,00  | 0,00  | 0,00  | 0,00  | 0,00  |
| DNASE2  | 5,97  | 6,36  | 5,08  | 7,11  | 5,73  | 4,85  | 6,81  | 7,39  | 5,07  |
| HNRNPU  | 9,94  | 7,42  | 9,15  | 7,11  | 3,82  | 6,79  | 4,86  | 4,62  | 7,10  |
| BTD     | 4,97  | 4,24  | 3,05  | 0,00  | 0,00  | 0,00  | 0,00  | 0,00  | 0,00  |
| COL18A1 | 4,97  | 4,24  | 5,08  | 0,00  | 0,00  | 0,00  | 0,00  | 0,00  | 0,00  |
| PSMA2   | 6,96  | 6,36  | 7,12  | 6,22  | 6,69  | 5,82  | 5,84  | 5,54  | 6,09  |

|         |       |       |       |       |       |       |       |       |       |
|---------|-------|-------|-------|-------|-------|-------|-------|-------|-------|
| UBE2V1  | 7,96  | 9,55  | 11,19 | 7,11  | 8,60  | 12,61 | 8,76  | 10,16 | 14,21 |
| LAMC1   | 15,91 | 14,85 | 17,29 | 10,67 | 10,51 | 12,61 | 9,73  | 7,39  | 8,12  |
| F11R    | 5,97  | 5,30  | 8,13  | 2,67  | 0,96  | 2,91  | 0,97  | 3,69  | 2,03  |
| EPCAM   | 6,96  | 8,49  | 6,10  | 0,89  | 0,96  | 1,94  | 0,97  | 1,85  | 2,03  |
| LRRFIP1 | 4,97  | 7,42  | 7,12  | 7,11  | 5,73  | 10,67 | 8,76  | 9,24  | 10,15 |
| WDR1    | 5,97  | 5,30  | 3,05  | 8,00  | 9,56  | 12,61 | 14,59 | 10,16 | 11,16 |
| EWSR1   | 6,96  | 8,49  | 7,12  | 4,44  | 4,78  | 1,94  | 4,86  | 3,69  | 2,03  |
| S100A13 | 5,97  | 5,30  | 6,10  | 4,44  | 5,73  | 4,85  | 5,84  | 3,69  | 5,07  |
| L1CAM   | 0,99  | 2,12  | 1,02  | 0,00  | 0,00  | 0,00  | 0,00  | 0,00  | 0,00  |
| CNBP    | 5,97  | 6,36  | 6,10  | 7,11  | 6,69  | 3,88  | 4,86  | 5,54  | 5,07  |
| RNASET2 | 4,97  | 7,42  | 5,08  | 0,00  | 0,00  | 0,00  | 0,00  | 0,00  | 0,00  |
| PPP2R4  | 6,96  | 8,49  | 7,12  | 5,33  | 4,78  | 5,82  | 4,86  | 6,46  | 8,12  |
| HSP90B1 | 6,96  | 5,30  | 0,00  | 21,34 | 23,90 | 21,35 | 25,30 | 19,40 | 19,28 |
| PSMA7   | 8,95  | 6,36  | 8,13  | 5,33  | 7,65  | 4,85  | 9,73  | 7,39  | 6,09  |
| NUMA1   | 3,98  | 4,24  | 4,07  | 0,00  | 0,00  | 0,00  | 0,00  | 0,00  | 0,00  |
| NCL     | 18,89 | 14,85 | 14,24 | 24,89 | 20,07 | 20,38 | 24,32 | 18,47 | 18,26 |
| RBBP4   | 6,96  | 6,36  | 8,13  | 5,33  | 8,60  | 5,82  | 5,84  | 5,54  | 4,06  |
| CD59    | 3,98  | 3,18  | 5,08  | 6,22  | 6,69  | 6,79  | 6,81  | 6,46  | 7,10  |
| ARHGDI1 | 6,96  | 9,55  | 7,12  | 8,00  | 6,69  | 6,79  | 3,89  | 6,46  | 6,09  |
| DBI     | 8,95  | 5,30  | 8,13  | 8,00  | 5,73  | 6,79  | 7,78  | 6,46  | 7,10  |
| HEXB    | 1,99  | 3,18  | 4,07  | 8,89  | 7,65  | 6,79  | 6,81  | 9,24  | 7,10  |
| PSME2   | 9,94  | 9,55  | 12,20 | 9,78  | 9,56  | 4,85  | 7,78  | 5,54  | 7,10  |
| CBX1    | 4,97  | 7,42  | 7,12  | 5,33  | 5,73  | 5,82  | 4,86  | 4,62  | 6,09  |
| FTH1    | 3,98  | 5,30  | 4,07  | 0,00  | 0,00  | 0,00  | 0,00  | 0,92  | 0,00  |
| CAPRIN1 | 4,97  | 6,36  | 4,07  | 6,22  | 4,78  | 6,79  | 5,84  | 5,54  | 7,10  |
| NOTCH2  | 4,97  | 7,42  | 10,17 | 1,78  | 0,96  | 1,94  | 1,95  | 1,85  | 3,04  |
| TFG     | 5,97  | 7,42  | 5,08  | 11,56 | 11,47 | 11,64 | 15,57 | 13,85 | 13,19 |
| HPRT1   | 7,96  | 6,36  | 7,12  | 10,67 | 9,56  | 7,76  | 10,70 | 8,31  | 8,12  |

|          |       |       |       |       |       |       |       |       |       |
|----------|-------|-------|-------|-------|-------|-------|-------|-------|-------|
| PCSK1N   | 7,96  | 8,49  | 6,10  | 1,78  | 1,91  | 1,94  | 2,92  | 3,69  | 3,04  |
| SSB      | 7,96  | 7,42  | 5,08  | 5,33  | 6,69  | 4,85  | 3,89  | 4,62  | 4,06  |
| TALDO1   | 8,95  | 7,42  | 6,10  | 4,44  | 5,73  | 5,82  | 5,84  | 6,46  | 6,09  |
| VASN     | 4,97  | 3,18  | 5,08  | 4,44  | 2,87  | 4,85  | 2,92  | 2,77  | 4,06  |
| PDIA4    | 2,98  | 3,18  | 4,07  | 20,45 | 20,07 | 23,29 | 20,43 | 21,24 | 24,35 |
| AHCY     | 6,96  | 7,42  | 7,12  | 11,56 | 11,47 | 8,73  | 14,59 | 14,78 | 12,18 |
| CSTB     | 5,97  | 6,36  | 7,12  | 7,11  | 7,65  | 6,79  | 5,84  | 8,31  | 7,10  |
| CLIC3    | 1,99  | 4,24  | 4,07  | 4,44  | 3,82  | 1,94  | 3,89  | 3,69  | 4,06  |
| KHSRP    | 7,96  | 10,61 | 5,08  | 5,33  | 5,73  | 6,79  | 3,89  | 6,46  | 4,06  |
| CMPK1    | 7,96  | 4,24  | 8,13  | 11,56 | 7,65  | 7,76  | 7,78  | 6,46  | 8,12  |
| ACAT2    | 5,97  | 6,36  | 5,08  | 3,56  | 2,87  | 2,91  | 2,92  | 4,62  | 3,04  |
| MAN2A1   | 4,97  | 3,18  | 4,07  | 0,00  | 0,96  | 0,00  | 0,00  | 0,00  | 0,00  |
| ME1      | 5,97  | 7,42  | 7,12  | 5,33  | 4,78  | 6,79  | 7,78  | 7,39  | 7,10  |
| XRCC6    | 6,96  | 5,30  | 6,10  | 5,33  | 3,82  | 2,91  | 0,97  | 0,92  | 1,01  |
| ATP6AP1  | 4,97  | 4,24  | 5,08  | 8,00  | 5,73  | 7,76  | 5,84  | 6,46  | 8,12  |
| SERPINA3 | 15,91 | 12,73 | 16,27 | 0,00  | 0,00  | 0,00  | 0,00  | 0,00  | 0,00  |
| PDCD6IP  | 7,96  | 7,42  | 6,10  | 12,45 | 10,51 | 12,61 | 9,73  | 9,24  | 11,16 |
| HNRNPA3  | 5,97  | 5,30  | 4,07  | 1,78  | 0,96  | 0,97  | 2,92  | 2,77  | 2,03  |
| PCNA     | 7,96  | 8,49  | 9,15  | 2,67  | 3,82  | 5,82  | 3,89  | 6,46  | 6,09  |
| RANBP1   | 6,96  | 6,36  | 6,10  | 4,44  | 6,69  | 5,82  | 7,78  | 5,54  | 6,09  |
| ACTR2    | 3,98  | 4,24  | 6,10  | 8,00  | 10,51 | 11,64 | 13,62 | 12,93 | 13,19 |
| EIF4A1   | 6,96  | 6,36  | 7,12  | 10,67 | 9,56  | 10,67 | 13,62 | 12,01 | 13,19 |
| PDCD5    | 5,97  | 4,24  | 8,13  | 3,56  | 4,78  | 5,82  | 5,84  | 3,69  | 8,12  |
| ISOC1    | 4,97  | 7,42  | 5,08  | 0,89  | 0,96  | 0,97  | 0,97  | 0,92  | 1,01  |
| EPRS     | 2,98  | 6,36  | 4,07  | 6,22  | 6,69  | 4,85  | 5,84  | 5,54  | 5,07  |
| KYNU     | 6,96  | 3,18  | 6,10  | 3,56  | 3,82  | 3,88  | 1,95  | 4,62  | 5,07  |
| RPS12    | 4,97  | 4,24  | 4,07  | 7,11  | 1,91  | 5,82  | 5,84  | 5,54  | 6,09  |
| PIIB     | 0,99  | 2,12  | 4,07  | 14,22 | 22,94 | 17,47 | 20,43 | 22,17 | 20,29 |

|          |       |       |       |      |       |      |      |       |      |
|----------|-------|-------|-------|------|-------|------|------|-------|------|
| AP2A1    | 1,99  | 3,18  | 3,05  | 3,56 | 2,87  | 0,97 | 0,97 | 1,85  | 3,04 |
| RBBP7    | 4,97  | 3,18  | 6,10  | 4,44 | 6,69  | 4,85 | 4,86 | 4,62  | 4,06 |
| CCT3     | 6,96  | 7,42  | 4,07  | 9,78 | 13,38 | 8,73 | 8,76 | 7,39  | 9,13 |
| PCMT1    | 4,97  | 7,42  | 6,10  | 5,33 | 6,69  | 6,79 | 6,81 | 5,54  | 8,12 |
| RAD23A   | 7,96  | 8,49  | 5,08  | 3,56 | 3,82  | 4,85 | 3,89 | 6,46  | 3,04 |
| NASP     | 10,94 | 6,36  | 8,13  | 2,67 | 0,00  | 0,97 | 0,00 | 0,00  | 0,00 |
| SEC23B   | 2,98  | 6,36  | 5,08  | 4,44 | 5,73  | 4,85 | 5,84 | 6,46  | 6,09 |
| APOA1BP  | 6,96  | 6,36  | 8,13  | 4,44 | 5,73  | 3,88 | 4,86 | 5,54  | 4,06 |
| DSTN     | 6,96  | 7,42  | 7,12  | 4,44 | 3,82  | 4,85 | 6,81 | 4,62  | 8,12 |
| ILF2     | 4,97  | 5,30  | 6,10  | 2,67 | 4,78  | 3,88 | 3,89 | 5,54  | 5,07 |
| SIAE     | 0,99  | 1,06  | 1,02  | 0,00 | 0,00  | 0,00 | 0,00 | 0,00  | 0,00 |
| ARPC5    | 6,96  | 7,42  | 7,12  | 4,44 | 6,69  | 6,79 | 8,76 | 6,46  | 5,07 |
| B4GALT1  | 5,97  | 3,18  | 6,10  | 3,56 | 2,87  | 3,88 | 0,97 | 1,85  | 2,03 |
| ENSA     | 5,97  | 7,42  | 5,08  | 2,67 | 2,87  | 2,91 | 3,89 | 3,69  | 2,03 |
| LGALS3BP | 22,87 | 26,52 | 24,40 | 8,00 | 10,51 | 9,70 | 8,76 | 10,16 | 7,10 |
| NCAM2    | 3,98  | 2,12  | 2,03  | 0,00 | 0,00  | 0,00 | 0,00 | 0,00  | 0,00 |
| DYNC1I2  | 5,97  | 4,24  | 5,08  | 5,33 | 3,82  | 2,91 | 4,86 | 4,62  | 4,06 |
| GM2A     | 5,97  | 4,24  | 4,07  | 2,67 | 1,91  | 0,97 | 1,95 | 1,85  | 1,01 |
| CCT5     | 8,95  | 7,42  | 5,08  | 9,78 | 12,43 | 7,76 | 9,73 | 10,16 | 5,07 |
| RBM8A    | 5,97  | 6,36  | 6,10  | 5,33 | 4,78  | 2,91 | 5,84 | 3,69  | 5,07 |
| PPP3CA   | 5,97  | 4,24  | 5,08  | 2,67 | 1,91  | 2,91 | 0,97 | 2,77  | 2,03 |
| INHBB    | 0,99  | 1,06  | 1,02  | 0,00 | 0,00  | 0,00 | 0,00 | 0,00  | 0,00 |
| PVRL4    | 6,96  | 5,30  | 5,08  | 1,78 | 3,82  | 1,94 | 1,95 | 1,85  | 1,01 |
| SEC23A   | 3,98  | 5,30  | 5,08  | 8,89 | 7,65  | 5,82 | 7,78 | 6,46  | 8,12 |
| HEBP2    | 4,97  | 5,30  | 6,10  | 3,56 | 4,78  | 4,85 | 3,89 | 4,62  | 4,06 |
| AP1B1    | 4,97  | 6,36  | 5,08  | 8,89 | 8,60  | 7,76 | 8,76 | 9,24  | 8,12 |
| AREG     | 5,96  | 4,36  | 4,10  | 8,00 | 6,69  | 6,79 | 6,81 | 6,46  | 4,06 |
| HINT1    | 6,96  | 6,36  | 5,08  | 4,44 | 5,73  | 5,82 | 6,81 | 6,46  | 7,10 |

|          |      |      |      |       |       |       |       |       |       |
|----------|------|------|------|-------|-------|-------|-------|-------|-------|
| PAFAH1B3 | 4,97 | 5,30 | 6,10 | 3,56  | 2,87  | 1,94  | 1,95  | 2,77  | 2,03  |
| COPG1    | 3,98 | 6,36 | 6,10 | 8,89  | 9,56  | 5,82  | 8,76  | 6,46  | 4,06  |
| RPLP1    | 4,97 | 6,36 | 7,12 | 5,33  | 8,60  | 7,76  | 8,76  | 8,31  | 10,15 |
| EIF4B    | 4,97 | 5,30 | 6,10 | 6,22  | 5,73  | 5,82  | 5,84  | 6,46  | 7,10  |
| NACA     | 5,97 | 4,24 | 5,08 | 6,22  | 4,78  | 4,85  | 5,84  | 4,62  | 3,04  |
| COPB2    | 3,98 | 5,30 | 5,08 | 3,56  | 4,78  | 5,82  | 3,89  | 4,62  | 5,07  |
| USP5     | 4,97 | 5,30 | 7,12 | 5,33  | 5,73  | 5,82  | 7,78  | 6,46  | 8,12  |
| RPSA     | 1,99 | 4,24 | 4,07 | 8,00  | 6,69  | 5,82  | 4,86  | 5,54  | 6,09  |
| LTA4H    | 4,97 | 2,12 | 4,07 | 4,44  | 4,78  | 5,82  | 3,89  | 6,46  | 6,09  |
| PAFAH1B2 | 4,97 | 4,24 | 5,08 | 3,56  | 3,82  | 3,88  | 3,89  | 5,54  | 3,04  |
| GSS      | 3,98 | 4,24 | 4,07 | 1,78  | 0,96  | 2,91  | 4,86  | 3,69  | 4,06  |
| PSMC3    | 2,98 | 3,18 | 7,12 | 10,67 | 8,60  | 7,76  | 7,78  | 9,24  | 8,12  |
| CAPZA2   | 4,97 | 4,24 | 5,08 | 3,56  | 4,78  | 4,85  | 5,84  | 4,62  | 5,07  |
| SUMO2    | 3,98 | 5,30 | 6,10 | 5,33  | 3,82  | 3,88  | 3,89  | 3,69  | 4,06  |
| DUT      | 1,99 | 4,24 | 2,03 | 3,56  | 1,91  | 0,97  | 1,95  | 0,92  | 2,03  |
| TAF15    | 4,97 | 5,30 | 4,07 | 3,56  | 1,91  | 5,82  | 1,95  | 2,77  | 4,06  |
| APEX1    | 6,96 | 9,55 | 7,12 | 6,22  | 3,82  | 4,85  | 4,86  | 4,62  | 5,07  |
| TIMP2    | 2,98 | 2,12 | 2,03 | 3,56  | 5,73  | 1,94  | 5,84  | 4,62  | 5,07  |
| USP14    | 7,96 | 3,18 | 4,07 | 7,11  | 5,73  | 6,79  | 5,84  | 7,39  | 8,12  |
| CNDP2    | 3,98 | 3,18 | 4,07 | 1,78  | 1,91  | 3,88  | 3,89  | 4,62  | 3,04  |
| SLC12A2  | 4,97 | 5,30 | 5,08 | 0,00  | 0,00  | 0,00  | 0,00  | 0,00  | 0,00  |
| ZYX      | 7,96 | 4,24 | 6,10 | 17,78 | 20,07 | 16,50 | 18,49 | 20,32 | 22,32 |
| AP2B1    | 3,98 | 4,24 | 2,03 | 2,67  | 4,78  | 1,94  | 5,84  | 1,85  | 3,04  |
| PLS1     | 3,98 | 3,18 | 5,08 | 1,78  | 1,91  | 2,91  | 2,92  | 0,92  | 1,01  |
| ZNF185   | 1,99 | 1,06 | 2,03 | 16,00 | 12,43 | 18,44 | 14,59 | 13,85 | 16,23 |
| ATP6AP2  | 2,98 | 2,12 | 4,07 | 5,33  | 6,69  | 6,79  | 4,86  | 4,62  | 6,09  |
| PSMB6    | 3,98 | 3,18 | 3,05 | 3,56  | 4,78  | 4,85  | 5,84  | 4,62  | 4,06  |
| DCTPP1   | 5,97 | 4,24 | 4,07 | 3,56  | 4,78  | 6,79  | 3,89  | 5,54  | 6,09  |

|          |       |       |      |       |       |       |       |       |       |
|----------|-------|-------|------|-------|-------|-------|-------|-------|-------|
| SERPINB6 | 4,97  | 3,18  | 4,07 | 1,78  | 0,96  | 1,94  | 2,92  | 2,77  | 2,03  |
| CAST     | 4,97  | 9,55  | 9,15 | 5,33  | 10,51 | 10,67 | 14,59 | 12,01 | 12,18 |
| RRBP1    | 2,98  | 2,12  | 3,05 | 15,11 | 13,38 | 15,52 | 11,68 | 12,93 | 8,12  |
| NAMPT    | 3,98  | 5,30  | 4,07 | 8,89  | 5,73  | 7,76  | 10,70 | 10,16 | 11,16 |
| 38595    | 3,98  | 4,24  | 5,08 | 5,33  | 4,78  | 3,88  | 3,89  | 8,31  | 7,10  |
| ERH      | 4,97  | 6,36  | 4,07 | 4,44  | 3,82  | 2,91  | 1,95  | 3,69  | 5,07  |
| DDX39B   | 1,99  | 2,12  | 5,08 | 2,67  | 0,96  | 2,91  | 1,95  | 3,69  | 4,06  |
| TMPO     | 4,97  | 6,36  | 6,10 | 2,67  | 2,87  | 5,82  | 1,95  | 2,77  | 2,03  |
| EIF4H    | 7,96  | 6,36  | 6,10 | 8,00  | 7,65  | 8,73  | 6,81  | 6,46  | 7,10  |
| ACP1     | 2,98  | 2,12  | 2,03 | 4,44  | 4,78  | 3,88  | 3,89  | 2,77  | 6,09  |
| CRIM1    | 0,99  | 1,06  | 1,02 | 0,00  | 0,00  | 0,00  | 0,00  | 0,00  | 0,00  |
| SNRPD2   | 3,98  | 5,30  | 5,08 | 3,56  | 3,82  | 2,91  | 3,89  | 3,69  | 4,06  |
| STMN1    | 3,98  | 6,36  | 3,05 | 0,00  | 0,00  | 0,00  | 0,00  | 0,00  | 0,00  |
| PGM2     | 3,98  | 4,24  | 6,10 | 2,67  | 0,96  | 1,94  | 0,97  | 3,69  | 2,03  |
| NUTF2    | 3,98  | 5,30  | 7,12 | 4,44  | 3,82  | 3,88  | 4,86  | 4,62  | 7,10  |
| CRIP2    | 4,97  | 4,24  | 5,08 | 1,78  | 1,91  | 0,97  | 2,92  | 2,77  | 1,01  |
| TCEB1    | 1,99  | 3,18  | 2,03 | 4,44  | 4,78  | 3,88  | 2,92  | 5,54  | 5,07  |
| NPC2     | 3,98  | 4,24  | 4,07 | 3,56  | 3,82  | 4,85  | 3,89  | 3,69  | 4,06  |
| IDH1     | 2,98  | 3,18  | 4,07 | 0,89  | 0,96  | 0,97  | 1,95  | 1,85  | 1,01  |
| GNS      | 0,99  | 2,12  | 3,05 | 8,00  | 7,65  | 5,82  | 6,81  | 7,39  | 8,12  |
| LGALS1   | 10,94 | 11,67 | 9,15 | 18,67 | 16,25 | 19,41 | 23,35 | 20,32 | 18,26 |
| COPB1    | 2,98  | 3,18  | 1,02 | 3,56  | 4,78  | 3,88  | 2,92  | 2,77  | 3,04  |
| TCEAL3   | 2,98  | 4,24  | 5,08 | 6,22  | 5,73  | 5,82  | 3,89  | 3,69  | 5,07  |
| PPT1     | 2,98  | 2,12  | 3,05 | 1,78  | 2,87  | 0,00  | 2,92  | 1,85  | 1,01  |
| STARD10  | 2,98  | 2,12  | 3,05 | 0,00  | 0,00  | 0,00  | 0,00  | 0,00  | 0,00  |
| PSMB2    | 2,98  | 3,18  | 2,03 | 4,44  | 4,78  | 4,85  | 4,86  | 3,69  | 6,09  |
| NONO     | 3,98  | 2,12  | 4,07 | 0,89  | 2,87  | 1,94  | 2,92  | 0,92  | 1,01  |
| UBE2I    | 5,97  | 4,24  | 4,07 | 3,56  | 0,00  | 0,97  | 2,92  | 1,85  | 2,03  |

|          |       |      |      |       |       |       |       |       |       |
|----------|-------|------|------|-------|-------|-------|-------|-------|-------|
| PTPRG    | 0,99  | 3,18 | 2,03 | 0,00  | 0,00  | 0,00  | 0,00  | 0,00  | 0,00  |
| GNB2L1   | 2,98  | 5,30 | 5,08 | 10,67 | 9,56  | 8,73  | 9,73  | 7,39  | 7,10  |
| PVRL2    | 4,97  | 4,24 | 2,03 | 0,89  | 0,96  | 0,00  | 0,00  | 0,00  | 0,00  |
| CORO1C   | 3,98  | 3,18 | 5,08 | 11,56 | 10,51 | 10,67 | 9,73  | 7,39  | 12,18 |
| PAICS    | 3,98  | 2,12 | 5,08 | 3,56  | 1,91  | 1,94  | 3,89  | 2,77  | 3,04  |
| LAMC2    | 0,00  | 0,00 | 0,00 | 45,34 | 47,79 | 49,48 | 46,70 | 46,18 | 46,67 |
| CALU     | 1,99  | 2,12 | 2,03 | 17,78 | 17,21 | 17,47 | 15,57 | 16,62 | 12,18 |
| HYOU1    | 2,98  | 0,00 | 3,05 | 22,22 | 17,21 | 24,26 | 21,40 | 20,32 | 17,25 |
| PPL      | 0,99  | 0,00 | 1,02 | 12,45 | 11,47 | 13,58 | 5,84  | 8,31  | 8,12  |
| AGR2     | 3,98  | 3,18 | 3,05 | 17,78 | 12,43 | 11,64 | 10,70 | 9,24  | 11,16 |
| ERO1L    | 0,00  | 0,00 | 0,00 | 8,89  | 9,56  | 9,70  | 10,70 | 11,08 | 10,15 |
| PRSS22   | 0,99  | 1,06 | 1,02 | 16,89 | 14,34 | 14,55 | 13,62 | 12,93 | 14,21 |
| TUBA4A   | 0,00  | 0,00 | 0,00 | 45,34 | 43,01 | 40,75 | 38,92 | 38,79 | 33,48 |
| SERPINH1 | 0,00  | 1,06 | 0,00 | 20,45 | 19,12 | 19,41 | 18,49 | 16,62 | 18,26 |
| ERP29    | 1,99  | 1,06 | 2,03 | 8,00  | 8,60  | 6,79  | 6,81  | 8,31  | 8,12  |
| PLOD2    | 0,00  | 0,00 | 0,00 | 19,56 | 18,16 | 23,29 | 23,35 | 18,47 | 22,32 |
| TXNDC5   | 0,00  | 1,06 | 0,00 | 8,89  | 10,51 | 9,70  | 10,70 | 7,39  | 8,12  |
| GOLM1    | 10,94 | 7,42 | 7,12 | 1,78  | 1,91  | 2,91  | 2,92  | 2,77  | 3,04  |
| DBN1     | 1,99  | 1,06 | 1,02 | 30,23 | 29,63 | 30,08 | 27,24 | 24,01 | 23,34 |
| PRDX4    | 0,00  | 0,00 | 0,00 | 8,89  | 8,60  | 8,73  | 8,76  | 8,31  | 9,13  |
| GANAB    | 0,99  | 1,06 | 1,02 | 8,89  | 6,69  | 7,76  | 6,81  | 6,46  | 4,06  |
| VGf      | 5,97  | 5,30 | 5,08 | 14,22 | 9,56  | 7,76  | 6,81  | 8,31  | 7,10  |
| CNPY2    | 0,99  | 1,06 | 1,02 | 7,11  | 6,69  | 6,79  | 7,78  | 7,39  | 6,09  |
| KTN1     | 0,00  | 1,06 | 0,00 | 8,89  | 6,69  | 4,85  | 6,81  | 5,54  | 7,10  |
| GPC4     | 1,99  | 2,12 | 2,03 | 0,89  | 0,00  | 0,00  | 0,97  | 1,85  | 1,01  |
| FSTL3    | 2,98  | 2,12 | 3,05 | 9,78  | 10,51 | 6,79  | 8,76  | 6,46  | 7,10  |
| ANXA2    | 3,98  | 2,12 | 4,07 | 10,67 | 9,56  | 7,76  | 9,73  | 10,16 | 8,12  |
| CLTB     | 4,97  | 2,12 | 1,02 | 5,33  | 7,65  | 4,85  | 5,84  | 6,46  | 3,04  |

|         |      |      |      |       |       |       |       |       |       |
|---------|------|------|------|-------|-------|-------|-------|-------|-------|
| KRT81   | 0,00 | 0,00 | 0,00 | 3,56  | 3,82  | 5,82  | 5,84  | 4,62  | 3,04  |
| OLFML3  | 0,00 | 0,00 | 0,00 | 13,34 | 14,34 | 12,61 | 13,62 | 11,08 | 12,18 |
| FN1     | 2,98 | 2,12 | 5,08 | 32,00 | 27,72 | 23,29 | 31,13 | 29,55 | 24,35 |
| PRSS8   | 2,98 | 4,24 | 3,05 | 3,56  | 1,91  | 0,97  | 0,97  | 2,77  | 2,03  |
| HK1     | 1,99 | 1,06 | 2,03 | 4,44  | 3,82  | 3,88  | 1,95  | 0,92  | 3,04  |
| HSPE1   | 3,98 | 1,06 | 2,03 | 4,44  | 5,73  | 9,70  | 4,86  | 7,39  | 5,07  |
| IDS     | 0,00 | 0,00 | 0,00 | 2,67  | 2,87  | 4,85  | 1,95  | 1,85  | 3,04  |
| FKBP2   | 0,00 | 0,00 | 0,00 | 1,78  | 5,73  | 2,91  | 1,95  | 2,77  | 3,04  |
| ECM1    | 0,00 | 0,00 | 0,00 | 0,00  | 0,00  | 0,00  | 0,00  | 0,00  | 0,00  |
| ERP44   | 0,00 | 0,00 | 0,00 | 3,56  | 2,87  | 1,94  | 4,86  | 4,62  | 3,04  |
| TXNRD1  | 5,97 | 3,18 | 6,10 | 9,78  | 10,51 | 9,70  | 7,78  | 10,16 | 8,12  |
| KIF5B   | 1,99 | 3,18 | 5,08 | 10,67 | 7,65  | 8,73  | 3,89  | 7,39  | 6,09  |
| RCN2    | 0,00 | 0,00 | 0,00 | 3,56  | 2,87  | 2,91  | 3,89  | 3,69  | 2,03  |
| TFPI    | 0,00 | 0,00 | 0,00 | 2,67  | 0,96  | 0,97  | 0,97  | 1,85  | 1,01  |
| ADAM9   | 2,98 | 1,06 | 0,00 | 4,44  | 3,82  | 2,91  | 3,89  | 3,69  | 2,03  |
| LAMB1   | 0,99 | 0,00 | 0,00 | 0,00  | 0,00  | 0,00  | 0,00  | 0,00  | 0,00  |
| PVR     | 1,99 | 3,18 | 3,05 | 3,56  | 4,78  | 6,79  | 4,86  | 5,54  | 7,10  |
| TXNL1   | 2,98 | 5,30 | 3,05 | 7,11  | 4,78  | 4,85  | 7,78  | 7,39  | 9,13  |
| S100A10 | 0,99 | 0,00 | 1,02 | 5,33  | 5,73  | 4,85  | 4,86  | 4,62  | 4,06  |
| COPE    | 0,99 | 2,12 | 3,05 | 3,56  | 2,87  | 3,88  | 5,84  | 3,69  | 4,06  |
| LRPAP1  | 0,00 | 0,00 | 0,00 | 0,89  | 0,96  | 0,00  | 0,00  | 0,00  | 0,00  |
| HEXA    | 2,98 | 3,18 | 1,02 | 1,78  | 0,00  | 1,94  | 3,89  | 1,85  | 2,03  |
| WARS    | 4,97 | 6,36 | 5,08 | 9,78  | 12,43 | 9,70  | 10,70 | 13,85 | 12,18 |
| RTN4    | 2,98 | 4,24 | 0,00 | 6,22  | 5,73  | 5,82  | 5,84  | 6,46  | 8,12  |
| PSMD2   | 3,98 | 2,12 | 3,05 | 10,67 | 10,51 | 7,76  | 7,78  | 6,46  | 6,09  |
| LAD1    | 0,00 | 0,00 | 0,00 | 3,56  | 3,82  | 6,79  | 3,89  | 5,54  | 5,07  |
| IDI1    | 0,99 | 1,06 | 0,00 | 1,78  | 3,82  | 1,94  | 3,89  | 2,77  | 4,06  |
| SEC22B  | 0,99 | 1,06 | 2,03 | 2,67  | 2,87  | 4,85  | 4,86  | 3,69  | 5,07  |

|          |      |      |      |       |       |      |      |       |      |
|----------|------|------|------|-------|-------|------|------|-------|------|
| HMGA1    | 0,99 | 1,06 | 1,02 | 5,33  | 3,82  | 5,82 | 3,89 | 4,62  | 6,09 |
| MYH9     | 0,99 | 0,00 | 0,00 | 14,22 | 14,34 | 8,73 | 3,89 | 5,54  | 3,04 |
| CYCS     | 0,99 | 1,06 | 0,00 | 4,44  | 3,82  | 4,85 | 2,92 | 3,69  | 2,03 |
| ARCN1    | 3,98 | 3,18 | 3,05 | 3,56  | 6,69  | 4,85 | 4,86 | 5,54  | 5,07 |
| SPAG9    | 0,00 | 1,06 | 1,02 | 6,22  | 4,78  | 5,82 | 6,81 | 8,31  | 5,07 |
| GRB2     | 2,98 | 4,24 | 3,05 | 5,33  | 2,87  | 2,91 | 2,92 | 3,69  | 3,04 |
| S100A16  | 4,97 | 4,24 | 4,07 | 9,78  | 4,78  | 3,88 | 3,89 | 4,62  | 3,04 |
| SYTL2    | 0,00 | 1,06 | 1,02 | 1,78  | 1,91  | 0,97 | 0,97 | 0,00  | 1,01 |
| FKBP3    | 2,98 | 3,18 | 4,07 | 3,56  | 3,82  | 2,91 | 3,89 | 2,77  | 3,04 |
| CRKL     | 1,99 | 2,12 | 3,05 | 2,67  | 2,87  | 2,91 | 3,89 | 5,54  | 3,04 |
| TGOLN2   | 1,99 | 4,24 | 3,05 | 1,78  | 1,91  | 1,94 | 2,92 | 2,77  | 3,04 |
| TMOD3    | 1,99 | 3,18 | 4,07 | 8,00  | 6,69  | 7,76 | 4,86 | 7,39  | 8,12 |
| SKP1     | 2,98 | 5,30 | 2,03 | 6,22  | 3,82  | 1,94 | 7,78 | 3,69  | 4,06 |
| SH3BGRL3 | 3,98 | 2,12 | 3,05 | 6,22  | 7,65  | 4,85 | 4,86 | 4,62  | 6,09 |
| OGFR     | 1,99 | 3,18 | 3,05 | 4,44  | 3,82  | 3,88 | 4,86 | 3,69  | 4,06 |
| BID      | 5,97 | 4,24 | 6,10 | 5,33  | 3,82  | 5,82 | 4,86 | 4,62  | 5,07 |
| PSMA6    | 5,97 | 4,24 | 5,08 | 6,22  | 4,78  | 1,94 | 5,84 | 6,46  | 6,09 |
| GPR126   | 0,00 | 0,00 | 0,00 | 0,00  | 0,00  | 0,00 | 0,00 | 0,00  | 0,00 |
| SEC24C   | 0,00 | 0,00 | 1,02 | 2,67  | 3,82  | 2,91 | 3,89 | 4,62  | 4,06 |
| TXNDC12  | 0,00 | 0,00 | 0,00 | 1,78  | 0,96  | 0,00 | 0,00 | 0,00  | 0,00 |
| PTPRJ    | 0,99 | 0,00 | 1,02 | 0,00  | 0,00  | 0,97 | 0,00 | 0,00  | 1,01 |
| KARS     | 7,96 | 7,42 | 9,15 | 8,00  | 8,60  | 8,73 | 8,76 | 10,16 | 9,13 |
| CTSA     | 0,99 | 1,06 | 2,03 | 1,78  | 1,91  | 3,88 | 2,92 | 3,69  | 4,06 |
| DDT      | 4,97 | 3,18 | 4,07 | 4,44  | 4,78  | 4,85 | 4,86 | 3,69  | 5,07 |
| CYR61    | 2,98 | 2,12 | 2,03 | 5,33  | 5,73  | 3,88 | 3,89 | 2,77  | 3,04 |
| PPIC     | 0,99 | 1,06 | 2,03 | 0,00  | 0,00  | 0,97 | 0,00 | 0,00  | 0,00 |
| MET      | 0,00 | 0,00 | 0,00 | 1,78  | 1,91  | 1,94 | 2,92 | 2,77  | 2,03 |
| PPP2CA   | 1,99 | 2,12 | 5,08 | 5,33  | 3,82  | 4,85 | 6,81 | 3,69  | 7,10 |



|          |       |      |       |       |       |       |       |       |       |
|----------|-------|------|-------|-------|-------|-------|-------|-------|-------|
| NUCKS1   | 8,95  | 7,42 | 10,17 | 8,00  | 8,60  | 8,73  | 5,84  | 7,39  | 8,12  |
| GNAS     | 12,93 | 6,36 | 7,12  | 1,78  | 2,87  | 0,97  | 0,97  | 0,92  | 2,03  |
| S100A14  | 8,95  | 8,49 | 7,12  | 8,00  | 5,73  | 6,79  | 6,81  | 7,39  | 8,12  |
| CRABP2   | 6,96  | 6,36 | 5,08  | 3,56  | 3,82  | 2,91  | 3,89  | 2,77  | 2,03  |
| GGCT     | 7,96  | 4,24 | 6,10  | 0,89  | 0,96  | 1,94  | 2,92  | 2,77  | 3,04  |
| ANP32B   | 5,97  | 6,36 | 5,08  | 4,44  | 6,69  | 7,76  | 7,78  | 7,39  | 7,10  |
| PDXK     | 5,97  | 6,36 | 5,08  | 5,33  | 6,69  | 3,88  | 5,84  | 4,62  | 5,07  |
| CAND1    | 4,97  | 6,36 | 5,08  | 6,22  | 7,65  | 8,73  | 6,81  | 4,62  | 7,10  |
| LAMB2    | 5,97  | 6,36 | 4,07  | 0,00  | 0,00  | 0,00  | 0,00  | 0,00  | 0,00  |
| GIPC1    | 5,97  | 5,30 | 5,08  | 3,56  | 4,78  | 3,88  | 1,95  | 3,69  | 4,06  |
| GNB1     | 6,96  | 4,24 | 4,07  | 0,00  | 0,00  | 0,97  | 0,97  | 0,92  | 2,03  |
| CD9      | 4,97  | 4,24 | 5,08  | 2,67  | 2,87  | 0,97  | 1,95  | 1,85  | 0,00  |
| CCT6A    | 3,98  | 6,36 | 3,05  | 5,33  | 8,60  | 6,79  | 5,84  | 7,39  | 7,10  |
| ST13     | 4,97  | 4,24 | 4,07  | 3,56  | 1,91  | 3,88  | 4,86  | 3,69  | 4,06  |
| DENR     | 4,97  | 4,24 | 4,07  | 3,56  | 3,82  | 4,85  | 3,89  | 2,77  | 4,06  |
| BLVRA    | 4,97  | 4,24 | 4,07  | 0,89  | 0,96  | 0,97  | 0,97  | 0,92  | 1,01  |
| EPHA4    | 4,97  | 4,24 | 4,07  | 0,00  | 0,00  | 0,00  | 0,00  | 0,00  | 0,00  |
| VPS35    | 4,97  | 4,24 | 4,07  | 2,67  | 3,82  | 2,91  | 1,95  | 3,69  | 6,09  |
| VBP1     | 5,97  | 4,24 | 3,05  | 6,22  | 2,87  | 2,91  | 1,95  | 2,77  | 3,04  |
| GARS     | 4,97  | 3,18 | 5,08  | 7,11  | 5,73  | 4,85  | 7,78  | 5,54  | 7,10  |
| FAM129B  | 3,98  | 2,12 | 7,12  | 3,56  | 5,73  | 5,82  | 3,89  | 4,62  | 4,06  |
| EDF1     | 2,98  | 4,24 | 5,08  | 2,67  | 1,91  | 1,94  | 1,95  | 1,85  | 3,04  |
| PPP1R14B | 3,98  | 4,24 | 4,07  | 7,11  | 3,82  | 1,94  | 1,95  | 1,85  | 3,04  |
| JUP      | 3,98  | 4,24 | 4,07  | 3,56  | 1,91  | 0,97  | 1,95  | 2,77  | 2,03  |
| TBCA     | 4,97  | 4,24 | 3,05  | 5,33  | 4,78  | 2,91  | 3,89  | 5,54  | 4,06  |
| NAP1L4   | 3,98  | 3,18 | 5,08  | 7,11  | 4,78  | 6,79  | 6,81  | 6,46  | 6,09  |
| GMFB     | 2,98  | 2,12 | 7,12  | 3,56  | 4,78  | 3,88  | 3,89  | 5,54  | 5,07  |
| MMP1     | 0,00  | 0,00 | 0,00  | 16,00 | 18,16 | 18,44 | 15,57 | 13,85 | 16,23 |

|        |      |      |      |       |       |       |       |       |       |
|--------|------|------|------|-------|-------|-------|-------|-------|-------|
| KRT17  | 0,00 | 0,00 | 0,00 | 13,34 | 15,29 | 13,58 | 13,62 | 12,93 | 14,21 |
| PDLIM7 | 0,00 | 0,00 | 0,00 | 10,67 | 12,43 | 12,61 | 11,68 | 10,16 | 12,18 |
| PLIN3  | 1,99 | 3,18 | 2,03 | 9,78  | 12,43 | 10,67 | 11,68 | 11,08 | 13,19 |
| CCT2   | 2,98 | 5,30 | 2,03 | 11,56 | 9,56  | 8,73  | 7,78  | 8,31  | 10,15 |
| ERBB2  | 0,00 | 0,00 | 0,00 | 10,67 | 7,65  | 9,70  | 9,73  | 6,46  | 8,12  |
| PSMC2  | 2,98 | 3,18 | 3,05 | 5,33  | 6,69  | 9,70  | 5,84  | 5,54  | 6,09  |
| FHL2   | 0,00 | 0,00 | 0,00 | 6,22  | 6,69  | 7,76  | 6,81  | 5,54  | 5,07  |
| OLA1   | 2,98 | 3,18 | 2,03 | 7,11  | 6,69  | 6,79  | 5,84  | 4,62  | 7,10  |
| CCT7   | 1,99 | 3,18 | 4,07 | 4,44  | 6,69  | 8,73  | 6,81  | 8,31  | 10,15 |
| EIF3B  | 3,98 | 3,18 | 4,07 | 4,44  | 7,65  | 6,79  | 7,78  | 5,54  | 7,10  |
| EFHD2  | 0,99 | 1,06 | 3,05 | 5,33  | 6,69  | 6,79  | 7,78  | 5,54  | 5,07  |
| TCP1   | 2,98 | 3,18 | 2,03 | 5,33  | 6,69  | 5,82  | 5,84  | 6,46  | 6,09  |
| CCT4   | 1,99 | 2,12 | 3,05 | 5,33  | 6,69  | 5,82  | 5,84  | 5,54  | 6,09  |
| ARPC1B | 1,99 | 4,24 | 1,02 | 3,56  | 7,65  | 5,82  | 4,86  | 8,31  | 8,12  |
| EIF2S2 | 1,99 | 3,18 | 4,07 | 5,33  | 5,73  | 5,82  | 6,81  | 9,24  | 5,07  |
| UBQLN1 | 2,98 | 2,12 | 3,05 | 6,22  | 4,78  | 5,82  | 9,73  | 10,16 | 8,12  |
| ISG15  | 1,99 | 2,12 | 2,03 | 4,44  | 6,69  | 4,85  | 3,89  | 3,69  | 4,06  |
| TNPO1  | 2,98 | 3,18 | 4,07 | 5,33  | 3,82  | 6,79  | 5,84  | 6,46  | 4,06  |
| EIF3G  | 0,99 | 4,24 | 3,05 | 3,56  | 3,82  | 7,76  | 2,92  | 4,62  | 8,12  |
| CDV3   | 2,98 | 2,12 | 3,05 | 4,44  | 5,73  | 4,85  | 5,84  | 3,69  | 2,03  |
| NUDC   | 2,98 | 3,18 | 5,08 | 5,33  | 4,78  | 4,85  | 3,89  | 9,24  | 9,13  |
| PSMC1  | 2,98 | 2,12 | 2,03 | 5,33  | 4,78  | 4,85  | 4,86  | 3,69  | 3,04  |
| LAMB3  | 0,00 | 0,00 | 0,00 | 5,33  | 4,78  | 4,85  | 6,81  | 3,69  | 2,03  |
| PTGES3 | 3,98 | 2,12 | 3,05 | 5,33  | 5,73  | 3,88  | 6,81  | 2,77  | 3,04  |
| CPA4   | 0,00 | 0,00 | 0,00 | 6,22  | 4,78  | 3,88  | 1,95  | 1,85  | 6,09  |
| PSMC6  | 1,99 | 2,12 | 1,02 | 4,44  | 3,82  | 5,82  | 3,89  | 5,54  | 5,07  |
| EIF3A  | 0,99 | 1,06 | 2,03 | 4,44  | 4,78  | 4,85  | 4,86  | 2,77  | 4,06  |
| COTL1  | 0,00 | 1,06 | 1,02 | 4,44  | 5,73  | 3,88  | 6,81  | 3,69  | 3,04  |

|        |      |      |      |      |      |      |      |      |      |
|--------|------|------|------|------|------|------|------|------|------|
| NAP1L1 | 1,99 | 2,12 | 3,05 | 5,33 | 3,82 | 4,85 | 3,89 | 2,77 | 3,04 |
| ABRACL | 1,99 | 2,12 | 2,03 | 2,67 | 4,78 | 5,82 | 2,92 | 3,69 | 4,06 |
| AHSA1  | 1,99 | 2,12 | 3,05 | 3,56 | 4,78 | 4,85 | 3,89 | 5,54 | 6,09 |
| SGTA   | 0,99 | 1,06 | 1,02 | 3,56 | 6,69 | 2,91 | 3,89 | 5,54 | 3,04 |
| EIF6   | 0,99 | 0,00 | 1,02 | 4,44 | 3,82 | 4,85 | 3,89 | 4,62 | 6,09 |
| PSMB5  | 5,97 | 2,12 | 2,03 | 5,33 | 3,82 | 3,88 | 4,86 | 3,69 | 6,09 |
| EIF4G1 | 0,99 | 1,06 | 0,00 | 5,33 | 3,82 | 3,88 | 3,89 | 1,85 | 5,07 |
| GLRX3  | 2,98 | 1,06 | 3,05 | 6,22 | 1,91 | 4,85 | 3,89 | 4,62 | 3,04 |
| NRBP1  | 1,99 | 2,12 | 3,05 | 2,67 | 4,78 | 4,85 | 5,84 | 3,69 | 4,06 |
| TMSB4X | 4,97 | 2,12 | 2,03 | 3,56 | 2,87 | 5,82 | 4,86 | 5,54 | 3,04 |
| AIMP1  | 0,99 | 3,18 | 3,05 | 3,56 | 3,82 | 4,85 | 1,95 | 3,69 | 4,06 |
| RAN    | 2,98 | 2,12 | 3,05 | 3,56 | 4,78 | 3,88 | 3,89 | 3,69 | 6,09 |
| PSME3  | 0,99 | 1,06 | 1,02 | 3,56 | 4,78 | 3,88 | 1,95 | 4,62 | 3,04 |
| BOLA2  | 2,98 | 2,12 | 2,03 | 4,44 | 3,82 | 3,88 | 2,92 | 3,69 | 3,04 |
| VAPB   | 0,00 | 0,00 | 1,02 | 4,44 | 3,82 | 3,88 | 4,86 | 3,69 | 3,04 |
| XPO1   | 2,98 | 3,18 | 3,05 | 4,44 | 4,78 | 2,91 | 2,92 | 1,85 | 1,01 |
| CACYBP | 3,98 | 1,06 | 2,03 | 4,44 | 4,78 | 2,91 | 5,84 | 4,62 | 4,06 |
| PXN    | 0,00 | 0,00 | 0,00 | 5,33 | 2,87 | 3,88 | 4,86 | 4,62 | 5,07 |
| DDX6   | 2,98 | 4,24 | 3,05 | 5,33 | 3,82 | 2,91 | 3,89 | 3,69 | 5,07 |
| YARS   | 0,99 | 1,06 | 1,02 | 5,33 | 3,82 | 2,91 | 1,95 | 3,69 | 3,04 |
| STAT1  | 0,00 | 0,00 | 0,00 | 5,33 | 3,82 | 2,91 | 3,89 | 2,77 | 3,04 |
| EIF2S1 | 1,99 | 3,18 | 1,02 | 6,22 | 3,82 | 1,94 | 4,86 | 2,77 | 5,07 |
| HSPD1  | 0,99 | 1,06 | 1,02 | 1,78 | 2,87 | 2,91 | 9,73 | 5,54 | 7,10 |
| CNN2   | 0,99 | 1,06 | 2,03 | 2,67 | 3,82 | 3,88 | 6,81 | 5,54 | 7,10 |
| VAT1   | 0,99 | 3,18 | 1,02 | 2,67 | 4,78 | 2,91 | 6,81 | 5,54 | 5,07 |
| PAK2   | 1,99 | 3,18 | 2,03 | 4,44 | 2,87 | 2,91 | 5,84 | 4,62 | 6,09 |
| RNF114 | 0,00 | 0,00 | 0,00 | 3,56 | 3,82 | 2,91 | 3,89 | 5,54 | 7,10 |
| ITGB1  | 0,00 | 0,00 | 0,00 | 2,67 | 2,87 | 3,88 | 2,92 | 4,62 | 7,10 |

|                          |         |         |         |         |         |         |         |         |         |
|--------------------------|---------|---------|---------|---------|---------|---------|---------|---------|---------|
| UFM1                     | 2,98    | 3,18    | 3,05    | 3,56    | 2,87    | 4,85    | 3,89    | 3,69    | 6,09    |
| TLN1                     | 1,99    | 3,18    | 3,05    | 1,78    | 1,91    | 0,00    | 2,92    | 5,54    | 5,07    |
| SERPINB1                 | 0,99    | 1,06    | 0,00    | 2,67    | 4,78    | 3,88    | 3,89    | 7,39    | 2,03    |
| RARS                     | 0,99    | 0,00    | 1,02    | 5,33    | 2,87    | 2,91    | 3,89    | 2,77    | 6,09    |
| SRM                      | 2,98    | 2,12    | 2,03    | 3,56    | 2,87    | 4,85    | 3,89    | 3,69    | 5,07    |
| ARPC5L                   | 2,98    | 1,06    | 3,05    | 2,67    | 3,82    | 4,85    | 3,89    | 4,62    | 4,06    |
| Total Spectral<br>counts | 7853,92 | 7866,30 | 7879,04 | 7879,83 | 7967,68 | 7935,89 | 7882,56 | 7929,66 | 7876,44 |
