# Supplementary material for: Role of ADAM17 in the non-cell autonomous effects of oncogene-induced senescence
Source: Springer Nature journal article supplement (doi:10.1186/s13058-015-0619-7), 2015-08-10
Supplement: MOESM3 [file 9781530]

Supplementary Table SII. Proteins identified by label-free quantitative proteomics secreted through the canonical pathway

| Gene Name | Proteins identified secreted (canonical) (Spectral Counts) |       |       |                         |       |       |                         |       |       |
|-----------|------------------------------------------------------------|-------|-------|-------------------------|-------|-------|-------------------------|-------|-------|
|           | +Doxy.                                                     |       |       | -Doxy.                  |       |       |                         |       |       |
|           | MCF7 Tet-Off p95HER2 #1                                    |       |       | MCF7 Tet-Off p95HER2 #1 |       |       | MCF7 Tet-Off p95HER2 #2 |       |       |
|           | A                                                          | B     | C     | A                       | B     | C     | A                       | B     | C     |
| AGR2      | 0,21                                                       | -0,09 | -0,14 | 2,29                    | 1,78  | 1,69  | 1,57                    | 1,36  | 1,63  |
| ALB       | -0,15                                                      | 0,05  | 0,09  | -0,71                   | 0,01  | -0,76 | -0,31                   | -0,38 | -0,53 |
| B2M       | 0,14                                                       | -0,24 | 0,07  | -0,02                   | -0,02 | -0,23 | -0,11                   | -0,58 | -0,17 |
| BTD       | 0,26                                                       | 0,05  | -0,39 | -3,87                   | -3,87 | -3,87 | -3,87                   | -3,87 | -3,87 |
| CALR      | 0,25                                                       | 0,11  | -0,44 | 1,45                    | 1,56  | 1,46  | 1,21                    | 1,36  | 1,37  |
| CALU      | -0,04                                                      | 0,04  | -0,01 | 2,94                    | 2,9   | 2,92  | 2,76                    | 2,85  | 2,41  |
| CGREF1    | 0,04                                                       | -0,12 | 0,07  | -4,34                   | -4,34 | -4,34 | -4,34                   | -4,34 | -4,34 |
| CLU       | 0,04                                                       | 0,08  | -0,13 | -1,98                   | -1,44 | -1,86 | -2,04                   | -2,12 | -2,45 |
| COL12A1   | -0,24                                                      | 0,02  | 0,18  | -5,99                   | -5,99 | -5,99 | -5,99                   | -5,99 | -5,99 |
| COL18A1   | 0,06                                                       | -0,16 | 0,09  | -4,08                   | -4,08 | -4,08 | -4,08                   | -4,08 | -4,08 |
| CPA4      | 0                                                          | 0     | 0     | 4,44                    | 4,08  | 3,8   | 2,9                     | 2,84  | 4,41  |
| CPE       | 0,05                                                       | 0,09  | -0,14 | -1,2                    | -1,1  | -1,76 | -1,44                   | -1,26 | -1,53 |
| CST3      | 0,17                                                       | -0,06 | -0,12 | -2,54                   | -1,89 | -2,42 | -2,12                   | -2,19 | -2,06 |
| CTSD      | 0,11                                                       | -0,06 | -0,05 | -0,82                   | -0,71 | -0,69 | -0,26                   | -0,49 | -0,27 |
| CYR61     | 0,29                                                       | -0,15 | -0,2  | 1,07                    | 1,17  | 0,64  | 0,65                    | 0,2   | 0,32  |
| DKK1      | 0,07                                                       | 0,16  | -0,27 | -2,98                   | -3,7  | -3,69 | -3,68                   | -3,74 | -3,64 |
| ECM1      | 0                                                          | 0     | 0     | 0                       | 0     | 0     | 0                       | 0     | 0     |
| EFEMP1    | 0,04                                                       | -0,03 | -0,01 | -5,88                   | -5,88 | -5,88 | -5,88                   | -5,88 | -5,88 |
| FN1       | -0,17                                                      | -0,61 | 0,54  | 3,13                    | 2,92  | 2,67  | 3,09                    | 3,01  | 2,74  |
| FSTL3     | 0,12                                                       | -0,32 | 0,15  | 1,74                    | 1,84  | 1,23  | 1,59                    | 1,16  | 1,29  |
| FUCA2     | -0,03                                                      | 0,04  | -0,01 | 1,16                    | 0,74  | -0,06 | 0,76                    | -0,11 | -0,01 |

|          |       |       |       |       |       |       |       |       |       |
|----------|-------|-------|-------|-------|-------|-------|-------|-------|-------|
| GDF15    | -0,13 | -0,04 | 0,16  | -0,11 | -0,01 | -0,08 | 0,01  | 0,02  | 0,07  |
| GGH      | 0,18  | -0,07 | -0,13 | -5,39 | -5,39 | -5,39 | -3,3  | -5,39 | -3,26 |
| GNAS     | 0,54  | -0,45 | -0,3  | -2,13 | -1,52 | -2,84 | -2,84 | -2,9  | -1,97 |
| GRN      | -0,17 | 0,27  | -0,14 | 0,83  | 0,53  | 0,29  | 0,77  | 0,69  | 0,49  |
| GSN      | -0,19 | -0,03 | 0,19  | -0,55 | -0,45 | -0,29 | -0,35 | -0,36 | -0,16 |
| HSPG2    | 0,14  | 0,23  | -0,47 | -2,65 | -4,64 | -4,64 | -2,55 | -2,61 | -2,51 |
| IFI30    | -0,37 | 0,53  | -0,35 | 2,14  | 1,85  | 1,62  | 2,08  | 1,8   | 2,14  |
| IGFBP2   | -0,15 | -0,03 | 0,16  | -1,56 | -1,45 | -1,58 | -1,58 | -1,65 | -1,3  |
| IGFBP4   | 0,08  | 0,11  | -0,22 | -1,62 | -1,92 | -1,69 | -1,9  | -1,97 | -2,39 |
| IGFBP5   | -0,14 | -0,02 | 0,15  | -7,52 | -7,52 | -7,52 | -7,52 | -7,52 | -7,52 |
| INHBB    | -0,03 | 0,04  | -0,01 | -2,14 | -2,14 | -2,14 | -2,14 | -2,14 | -2,14 |
| LAMA5    | -0,22 | 0,24  | -0,06 | -2,61 | -6,3  | -2,19 | -6,3  | -4,27 | -4,16 |
| LAMB1    | 1,04  | -1,07 | -1,07 | -1,07 | -1,07 | -1,07 | -1,07 | -1,07 | -1,07 |
| LAMB2    | 0,12  | 0,21  | -0,4  | -4,26 | -4,26 | -4,26 | -4,26 | -4,26 | -4,26 |
| LAMB3    | 0     | 0     | 0     | 4,23  | 4,08  | 4,1   | 4,57  | 3,73  | 2,96  |
| LAMC1    | -0,01 | -0,11 | 0,11  | -0,57 | -0,59 | -0,34 | -0,7  | -1,09 | -0,95 |
| LAMC2    | 0     | 0     | 0     | 7,25  | 7,32  | 7,37  | 7,29  | 7,28  | 7,29  |
| LGALS3BP | -0,1  | 0,11  | -0,01 | -1,58 | -1,2  | -1,32 | -1,46 | -1,25 | -1,75 |
| LTBP1    | -0,12 | -0,03 | 0,13  | -5,47 | -5,47 | -5,47 | -5,47 | -5,47 | -5,47 |
| MDK      | 0,03  | 0,01  | -0,05 | -1,45 | -1,1  | -1,33 | -1,62 | -1,15 | -2,47 |
| MMP1     | 0     | 0     | 0     | 5,76  | 5,94  | 5,96  | 5,72  | 5,56  | 5,78  |
| MUC5B    | 0,16  | -0,1  | -0,08 | -6,11 | -6,11 | -6,11 | -6,11 | -6,11 | -6,11 |
| NPC2     | -0,04 | 0,05  | -0,01 | -0,19 | -0,09 | 0,23  | -0,07 | -0,14 | -0,01 |
| NUCB2    | 0,25  | 0,13  | -0,48 | -0,36 | -0,26 | -0,54 | -0,54 | -0,31 | 0,07  |
| OLFML3   | 0     | 0     | 0     | 5,51  | 5,61  | 5,43  | 5,54  | 5,25  | 5,38  |
| PCSK1N   | 0,08  | 0,17  | -0,29 | -1,91 | -1,82 | -1,8  | -1,28 | -0,97 | -1,22 |
| PRDX4    | 0     | 0     | 0     | 4,94  | 4,89  | 4,91  | 4,92  | 4,84  | 4,97  |
| PRSS22   | -0,03 | 0,04  | -0,01 | 3,7   | 3,47  | 3,49  | 3,39  | 3,32  | 3,45  |

|          |       |       |       |       |       |       |       |       |       |
|----------|-------|-------|-------|-------|-------|-------|-------|-------|-------|
| PXDN     | -0,06 | 0,13  | -0,08 | -2,63 | -3,21 | -3,71 | -2,26 | -2,88 | -3,13 |
| RNASET2  | -0,22 | 0,33  | -0,19 | -4,35 | -4,35 | -4,35 | -4,35 | -4,35 | -4,35 |
| SEMA3B   | 0     | 0     | 0     | 2,79  | 0     | 0     | 0     | 2,03  | 0     |
| SEMA3C   | 0,12  | -0,1  | -0,03 | -4,34 | -4,26 | -6,33 | -4,25 | -6,33 | -6,33 |
| SERPINA3 | 0,09  | -0,23 | 0,12  | -5,67 | -5,67 | -5,67 | -5,67 | -5,67 | -5,67 |
| SIAE     | -0,03 | 0,04  | -0,01 | -2,14 | -2,14 | -2,14 | -2,14 | -2,14 | -2,14 |
| SPINT1   | 0,15  | 0,05  | -0,23 | -0,41 | -0,1  | -0,69 | -0,29 | 0,04  | -0,23 |
| STC2     | -0,09 | 0     | 0,08  | -2,36 | -2,42 | -3,05 | -2,58 | -2,66 | -2,99 |
| TFF1     | -0,16 | 0,06  | 0,08  | -1,71 | -1,61 | -1,47 | -1,84 | -1,54 | -1,41 |
| TFF3     | 0,02  | -0,07 | 0,05  | -5,82 | -5,82 | -5,82 | -5,82 | -5,82 | -5,82 |
| TIMP1    | 0,02  | -0,17 | 0,13  | -0,14 | -0,04 | -0,19 | -0,29 | -0,17 | -0,33 |
| TIMP2    | 0,29  | -0,15 | -0,2  | 0,53  | 1,17  | -0,26 | 1,2   | 0,88  | 1     |
| VGF      | 0,12  | -0,04 | -0,1  | 1,34  | 0,78  | 0,49  | 0,31  | 0,58  | 0,36  |
