# Supplementary material for: Role of ADAM17 in the non-cell autonomous effects of oncogene-induced senescence
Source: Springer Nature journal article supplement (doi:10.1186/s13058-015-0619-7), 2015-08-10
Supplement: MOESM4 [file 9781530]

Supplementary Table SIII. Proteins identified by label-free quantitative proteomics with transmembrane or GPI-anchored domains and mRNA levels by transcriptomic analysis.

| Gene Name | Proteins with transmembrane or GPI domains (Spectral Counts) |       |       |                         |       |       |                         |       |       | mRNA (Log2FC)           |                         |                         |
|-----------|--------------------------------------------------------------|-------|-------|-------------------------|-------|-------|-------------------------|-------|-------|-------------------------|-------------------------|-------------------------|
|           | +Doxy.                                                       |       |       | -Doxy.                  |       |       |                         |       |       | +Doxy.                  | -Doxy.                  |                         |
|           | MCF7 Tet-Off p95HER2 #1                                      |       |       | MCF7 Tet-Off p95HER2 #1 |       |       | MCF7 Tet-Off p95HER2 #2 |       |       | MCF7 Tet-Off p95HER2 #1 | MCF7 Tet-Off p95HER2 #1 | MCF7 Tet-Off p95HER2 #2 |
|           | A                                                            | B     | C     | A                       | B     | C     | A                       | B     | C     |                         |                         |                         |
| ADAM9     | 2,98                                                         | 1,06  | 0,00  | 4,44                    | 3,82  | 2,91  | 3,89                    | 3,69  | 2,03  | -0,01                   | 1,12                    | 1,21                    |
| ALCAM     | 26,85                                                        | 27,58 | 23,39 | 6,22                    | 7,65  | 9,70  | 3,89                    | 6,46  | 7,10  | -0,02                   | 0,37                    | 0,43                    |
| APLP2     | 10,94                                                        | 7,42  | 7,12  | 6,22                    | 6,69  | 4,85  | 5,84                    | 2,77  | 6,09  | -0,05                   | 0,82                    | 0,99                    |
| APP       | 26,85                                                        | 26,52 | 31,52 | 14,22                   | 11,47 | 11,64 | 13,62                   | 12,01 | 12,18 | -0,42                   | 0,07                    | 0,46                    |
| AREG      | 5,96                                                         | 4,36  | 4,10  | 8,00                    | 6,69  | 6,79  | 6,81                    | 6,46  | 4,06  | -0,11                   | 0,82                    | 1,51                    |
| ATP6AP1   | 4,97                                                         | 4,24  | 5,08  | 8,00                    | 5,73  | 7,76  | 5,84                    | 6,46  | 8,12  | 0,13                    | 0,33                    | 0,26                    |
| ATP6AP2   | 2,98                                                         | 2,12  | 4,07  | 5,33                    | 6,69  | 6,79  | 4,86                    | 4,62  | 6,09  | -0,24                   | -0,12                   | 0,02                    |
| B4GALT1   | 5,97                                                         | 3,18  | 6,10  | 3,56                    | 2,87  | 3,88  | 0,97                    | 1,85  | 2,03  | 0,11                    | 0,52                    | 0,39                    |
| BCAM      | 14,92                                                        | 15,91 | 14,24 | 0,00                    | 0,00  | 0,00  | 0,00                    | 0,00  | 0,00  | 0,42                    | 0,13                    | -0,11                   |
| CADM1     | 3,98                                                         | 4,24  | 4,07  | 0,00                    | 0,00  | 0,00  | 0,00                    | 0,00  | 0,00  | -0,02                   | -0,60                   | -0,54                   |
| CD59      | 3,98                                                         | 3,18  | 5,08  | 6,22                    | 6,69  | 6,79  | 6,81                    | 6,46  | 7,10  | 0,11                    | 2,14                    | 2,11                    |
| CD9       | 4,97                                                         | 4,24  | 5,08  | 2,67                    | 2,87  | 0,97  | 1,95                    | 1,85  | 0,00  | -0,19                   | 0,07                    | 0,09                    |
| CDH1      | 20,88                                                        | 20,15 | 21,35 | 8,89                    | 10,51 | 11,64 | 8,76                    | 10,16 | 9,13  | -0,31                   | 0,39                    | 0,35                    |
| CELSR2    | 22,87                                                        | 25,46 | 23,39 | 0,00                    | 0,00  | 0,00  | 0,00                    | 0,00  | 0,00  | 0,09                    | -0,43                   | -0,56                   |
| CLIC1     | 13,92                                                        | 14,85 | 17,29 | 19,56                   | 21,03 | 21,35 | 25,30                   | 22,17 | 22,32 | -0,02                   | 0,72                    | 0,65                    |
| CLIC3     | 1,99                                                         | 4,24  | 4,07  | 4,44                    | 3,82  | 1,94  | 3,89                    | 3,69  | 4,06  | -0,02                   | -1,66                   | -1,66                   |
| CLSTN1    | 43,75                                                        | 39,25 | 37,62 | 14,22                   | 14,34 | 16,50 | 14,59                   | 16,62 | 16,23 | 0,16                    | 0,67                    | 0,47                    |
| CRIM1     | 0,99                                                         | 1,06  | 1,02  | 0,00                    | 0,00  | 0,00  | 0,00                    | 0,00  | 0,00  | -0,29                   | 0,59                    | 0,99                    |
| DAG1      | 9,94                                                         | 11,67 | 11,19 | 2,67                    | 1,91  | 2,91  | 1,95                    | 1,85  | 3,04  | -0,05                   | 0,07                    | -0,04                   |

|        |       |       |       |       |       |       |       |       |       |       |       |       |
|--------|-------|-------|-------|-------|-------|-------|-------|-------|-------|-------|-------|-------|
| DDR1   | 5,97  | 5,30  | 5,08  | 0,00  | 0,00  | 0,00  | 0,00  | 0,92  | 0,00  | 0,04  | 0,62  | 0,48  |
| EPCAM  | 6,96  | 8,49  | 6,10  | 0,89  | 0,96  | 1,94  | 0,97  | 1,85  | 2,03  | -0,13 | -0,17 | -0,09 |
| EPHA2  | 0,99  | 0,00  | 1,02  | 2,67  | 2,87  | 2,91  | 3,89  | 3,69  | 3,04  | 0,14  | 2,92  | 2,75  |
| EPHA4  | 4,97  | 4,24  | 4,07  | 0,00  | 0,00  | 0,00  | 0,00  | 0,00  | 0,00  | -0,08 | 0,08  | 0,07  |
| EPHB4  | 8,95  | 11,67 | 8,13  | 0,00  | 0,00  | 0,00  | 0,00  | 0,00  | 0,00  | 0,14  | -0,19 | -0,11 |
| F11R   | 5,97  | 5,30  | 8,13  | 2,67  | 0,96  | 2,91  | 0,97  | 3,69  | 2,03  | 0,06  | 0,52  | 0,41  |
| FREM2  | 0,99  | 4,24  | 3,05  | 0,00  | 0,00  | 0,00  | 0,00  | 0,00  | 0,00  | -0,16 | -3,43 | -3,65 |
| GFRA1  | 5,97  | 5,30  | 6,10  | 0,00  | 0,00  | 0,00  | 0,00  | 0,00  | 0,00  | 0,31  | -2,75 | -2,88 |
| GLG1   | 5,97  | 7,42  | 7,12  | 1,78  | 1,91  | 0,97  | 1,95  | 2,77  | 2,03  | -0,06 | 0,19  | 0,26  |
| GOLM1  | 10,94 | 7,42  | 7,12  | 1,78  | 1,91  | 2,91  | 2,92  | 2,77  | 3,04  | 0,11  | 0,49  | 0,36  |
| GPC1   | 5,97  | 9,55  | 8,13  | 0,00  | 0,00  | 0,00  | 0,00  | 0,00  | 0,00  | 0,13  | 0,21  | 0,10  |
| GPC4   | 1,99  | 2,12  | 2,03  | 0,89  | 0,00  | 0,00  | 0,97  | 1,85  | 1,01  | -0,06 | 1,42  | 1,43  |
| GPR126 | 0,00  | 0,00  | 0,00  | 0,00  | 0,00  | 0,00  | 0,00  | 0,00  | 0,00  | -0,25 | 0,58  | 0,58  |
| HLA-A  | 2,98  | 2,12  | 3,05  | 4,44  | 3,82  | 2,91  | 2,92  | 4,62  | 5,07  | 0,15  | 1,44  | 1,33  |
| ITGB1  | 0,00  | 0,00  | 0,00  | 2,67  | 2,87  | 3,88  | 2,92  | 4,62  | 7,10  | -0,04 | 0,96  | 0,95  |
| KTN1   | 0,00  | 1,06  | 0,00  | 8,89  | 6,69  | 4,85  | 6,81  | 5,54  | 7,10  | -0,07 | 0,44  | 0,48  |
| L1CAM  | 0,99  | 2,12  | 1,02  | 0,00  | 0,00  | 0,00  | 0,00  | 0,00  | 0,00  | 0,21  | -0,50 | -0,66 |
| LDLR   | 0,99  | 1,06  | 1,02  | 0,89  | 0,96  | 1,94  | 2,92  | 0,92  | 2,03  | -0,01 | 0,79  | 0,64  |
| LSR    | 15,91 | 16,97 | 17,29 | 11,56 | 13,38 | 12,61 | 14,59 | 12,01 | 14,21 | 0,17  | 0,80  | 0,40  |
| LYPD3  | 14,92 | 14,85 | 15,25 | 6,22  | 6,69  | 5,82  | 5,84  | 5,54  | 7,10  | 0,19  | 0,93  | 0,71  |
| MAN2A1 | 4,97  | 3,18  | 4,07  | 0,00  | 0,96  | 0,00  | 0,00  | 0,00  | 0,00  | -0,10 | 0,51  | 0,62  |
| MET    | 0,00  | 0,00  | 0,00  | 1,78  | 1,91  | 1,94  | 2,92  | 2,77  | 2,03  | -0,10 | 2,19  | 2,16  |
| NCAM2  | 3,98  | 2,12  | 2,03  | 0,00  | 0,00  | 0,00  | 0,00  | 0,00  | 0,00  | -0,14 | -1,31 | -1,24 |
| NEO1   | 10,94 | 15,91 | 12,20 | 0,00  | 0,00  | 0,00  | 0,00  | 0,00  | 0,00  | -0,03 | -0,15 | -0,18 |
| NOTCH2 | 4,97  | 7,42  | 10,17 | 1,78  | 0,96  | 1,94  | 1,95  | 1,85  | 3,04  | -0,14 | -0,03 | 0,07  |
| NRCAM  | 18,89 | 16,97 | 14,24 | 0,00  | 0,00  | 0,00  | 0,00  | 0,00  | 0,00  | -0,08 | -0,54 | -0,44 |
| NRP1   | 8,95  | 7,42  | 9,15  | 3,56  | 0,96  | 2,91  | 0,97  | 1,85  | 2,03  | 0,02  | 0,26  | 0,42  |
| PODXL  | 0,00  | 0,00  | 0,00  | 0,00  | 0,00  | 0,00  | 0,00  | 0,00  | 0,00  | 0,02  | 1,21  | 1,39  |

|                          |            |        |        |        |        |        |        |       |        |       |       |       |
|--------------------------|------------|--------|--------|--------|--------|--------|--------|-------|--------|-------|-------|-------|
| PRSS8                    | 2,98       | 4,24   | 3,05   | 3,56   | 1,91   | 0,97   | 0,97   | 2,77  | 2,03   | 0,21  | 1,16  | 0,86  |
| PTPRF                    | 42,76      | 56,22  | 49,82  | 0,00   | 0,00   | 0,00   | 0,00   | 0,00  | 0,00   | -0,01 | -0,04 | -0,01 |
| PTPRG                    | 0,99       | 3,18   | 2,03   | 0,00   | 0,00   | 0,00   | 0,00   | 0,00  | 0,00   | -0,05 | 0,05  | -0,11 |
| PTPRJ                    | 0,99       | 0,00   | 1,02   | 0,00   | 0,00   | 0,97   | 0,00   | 0,00  | 1,01   | -0,03 | 0,26  | 0,48  |
| PTPRK                    | 15,91      | 15,91  | 18,30  | 1,78   | 0,96   | 0,97   | 0,97   | 1,85  | 1,01   | 0,06  | -0,13 | -0,04 |
| PVR                      | 1,99       | 3,18   | 3,05   | 3,56   | 4,78   | 6,79   | 4,86   | 5,54  | 7,10   | 0,19  | 1,25  | 1,06  |
| PVRL2                    | 4,97       | 4,24   | 2,03   | 0,89   | 0,96   | 0,00   | 0,00   | 0,00  | 0,00   | 0,29  | 0,34  | 0,01  |
| PVRL4                    | 6,96       | 5,30   | 5,08   | 1,78   | 3,82   | 1,94   | 1,95   | 1,85  | 1,01   | -0,27 | 0,80  | 0,64  |
| QSOX1                    | 33,81      | 32,88  | 29,49  | 60,45  | 57,35  | 57,25  | 54,48  | 54,49 | 55,80  | -0,14 | 2,33  | 2,23  |
| RRBP1                    | 2,98       | 2,12   | 3,05   | 15,11  | 13,38  | 15,52  | 11,68  | 12,93 | 8,12   | 0,11  | 0,46  | 0,54  |
| RTN4                     | 2,98       | 4,24   | 0,00   | 6,22   | 5,73   | 5,82   | 5,84   | 6,46  | 8,12   | 0,08  | 0,37  | 0,49  |
| SDC4                     | 11,93      | 13,79  | 13,22  | 8,89   | 10,51  | 9,70   | 11,68  | 10,16 | 11,16  | 0,10  | 1,54  | 1,56  |
| SEC22B                   | 0,99       | 1,06   | 2,03   | 2,67   | 2,87   | 4,85   | 4,86   | 3,69  | 5,07   | -0,05 | -0,02 | 0,19  |
| SLC12A2                  | 4,97       | 5,30   | 5,08   | 0,00   | 0,00   | 0,00   | 0,00   | 0,00  | 0,00   | -0,15 | -0,82 | -0,76 |
| SLC3A2                   | 9,94       | 11,67  | 9,15   | 11,56  | 12,43  | 11,64  | 13,62  | 12,01 | 10,15  | -0,03 | -0,14 | -0,30 |
| ST14                     | 9,94       | 8,49   | 13,22  | 4,44   | 3,82   | 6,79   | 3,89   | 4,62  | 4,06   | 0,01  | 0,65  | 0,43  |
| TGOLN2                   | 1,99       | 4,24   | 3,05   | 1,78   | 1,91   | 1,94   | 2,92   | 2,77  | 3,04   | -0,06 | 0,33  | 0,26  |
| TMPO                     | 4,97       | 6,36   | 6,10   | 2,67   | 2,87   | 5,82   | 1,95   | 2,77  | 2,03   | 0,09  | -0,95 | -1,04 |
| ULBP2                    | 0,00       | 1,06   | 1,02   | 1,78   | 1,91   | 4,85   | 2,92   | 1,85  | 5,07   | -0,14 | 2,50  | 2,28  |
| VAPB                     | 0,00       | 0,00   | 1,02   | 4,44   | 3,82   | 3,88   | 4,86   | 3,69  | 3,04   | 0,10  | 0,03  | -0,14 |
| VASN                     | 4,97       | 3,18   | 5,08   | 4,44   | 2,87   | 4,85   | 2,92   | 2,77  | 4,06   | 0,07  | 1,26  | 1,23  |
| Total Spectral<br>counts | 550,9<br>0 | 569,72 | 557,23 | 303,14 | 292,48 | 311,46 | 292,85 | 1     | 304,38 |       |       |       |
