# Supplementary material for: Role of ADAM17 in the non-cell autonomous effects of oncogene-induced senescence
Source: Springer Nature journal article supplement (doi:10.1186/s13058-015-0619-7), 2015-08-10
Supplement: MOESM6 [file 9781530]

Supplementary Table SIV. List of confirmed proteins from label-free proteomic analysis.

| Transmembrane protein | Molecular weight | Reference |
|-----------------------|------------------|-----------|
| Met                   | 145-175 kDa      | [33]      |
| sMet                  | 80 kDa           |           |
| APP                   | 110-135 kDa      | [34]      |
| sAPP                  | 115 kDa          |           |
| EpCAM                 | 31-39 kDa        | [35]      |
| sEpCAM                | 33 kDa           |           |
| EphB4                 | 110 kDa          | [36]      |
| sEphB4                | 60 kDa           |           |
| DDR1                  | 120 kDa          | [14]      |
| sDDR1                 | 60 kDa           |           |
